# Supplementary material for: Aliphatic tertiary amine catalysed urethane formation – a combined experimental and theoretical study
Source: Royal Society of Chemistry journal article supplement (doi:10.1039/d2cp00728b), 2022-01-01
Supplement: d2cp00728b1.pdf [file d2cp00728b1.pdf]

## Supplementary Information

# Aliphatic Tertiary Amine Catalysed Urethane Formation – A Combined Experimental and Theoretical Study

Hadeer Q. Waleed<sup>a</sup>, Marcell Csécsi<sup>a</sup>, Vivien Konyhás<sup>a</sup>, R. Zsanett Boros<sup>b</sup>, Zsolt Fejes<sup>a,\*</sup>,  
Béla Fiser<sup>a,c,d,\*</sup>, Béla Viskolcz<sup>a</sup>

<sup>a</sup> Institute of Chemistry, University of Miskolc, Miskolc-Egyetemváros A/2, H-3515, Miskolc, Hungary

<sup>b</sup> Wanhua-BorsodChem Zrt, Bolyai tér 1., H-3700 Kazincbarcika, Hungary

<sup>c</sup> Higher Education and Industrial Cooperation Centre, University of Miskolc, 3515 Miskolc-Egyetemváros, Hungary

<sup>d</sup> Ferenc Rákóczi II. Transcarpathian Hungarian College of Higher Education, 90200 Beregszász, Transcarpathia, Ukraine

\* Correspondence: kemfiser@uni-miskolc.hu (B.F.); kemfejes@uni-miskolc.hu (Zs.F.); Tel.: +36-46-565-111/1342 (B.F.); +36-46-565-111/1911 (Zs.F.)

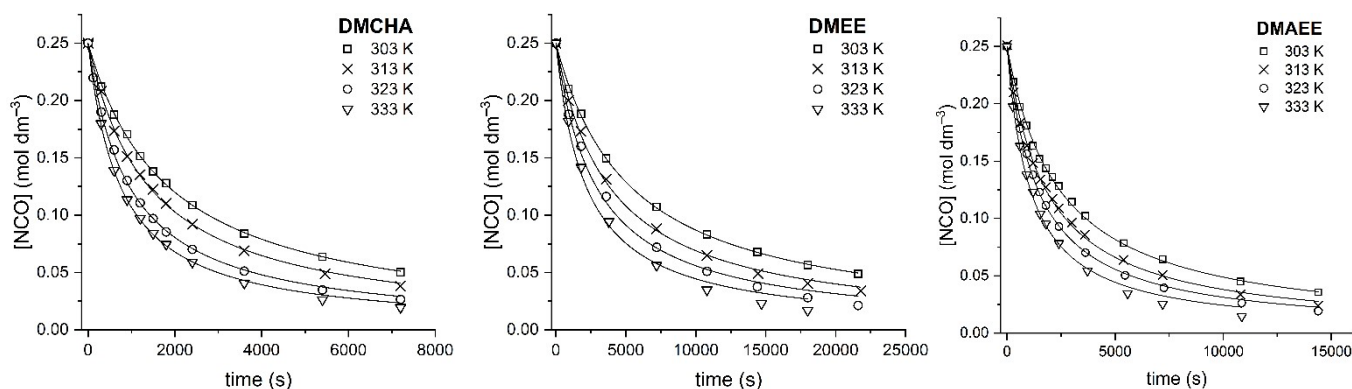

Figure S1. Second-order kinetic curves fitted using nonlinear regression.

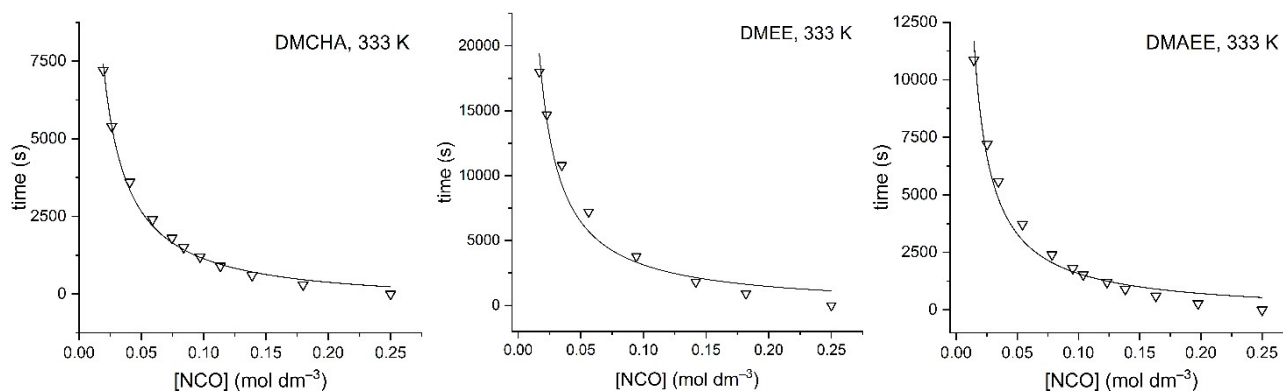

$$\frac{d[NCO]}{dt} = k_1[NCO]^2 + k_2[NCO]^2[NCO_0 - NCO]$$

Figure S2. Experimental kinetic data points at 333 K fitted with the above rate equation (autocatalytic effect considered).

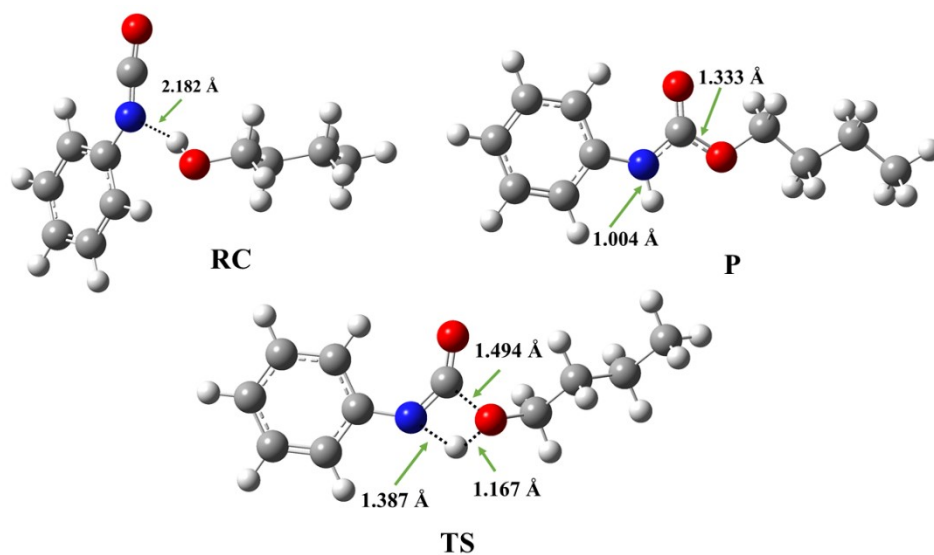

**Figure S3.** 3D structures of the reactant complex (**RC**), transition state (**TS**), and product (**P**) in the catalyst-free urethane formation. The structures have been optimized at the BHandHLYP/6-31G(d) level of theory in acetonitrile at 298.15 K and 1 atm.

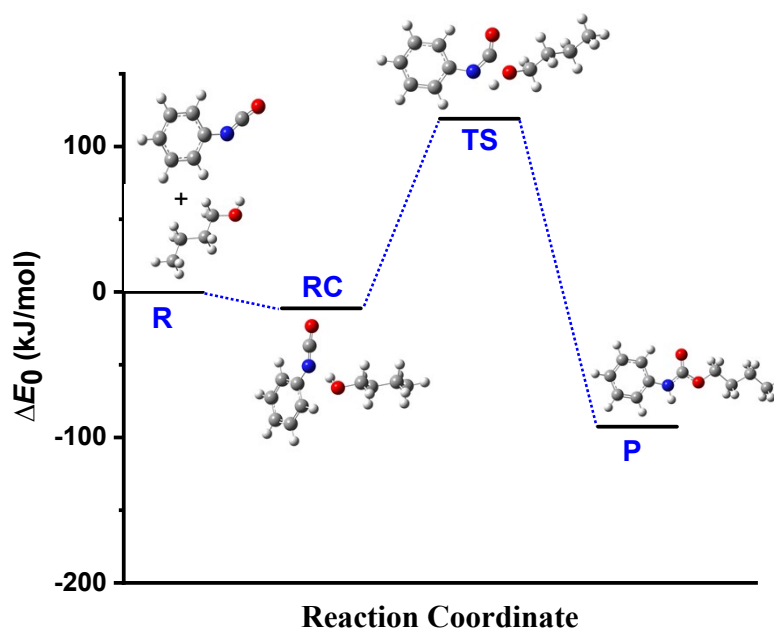

**Figure S4.** Energy profile (zero-point corrected) of the phenyl isocyanate (PhNCO) and butan-1-ol reaction calculated at the G3MP2BHandHLYP composite method in acetonitrile using the SMD implicit solvent model at 298.15 K and 1 atm.

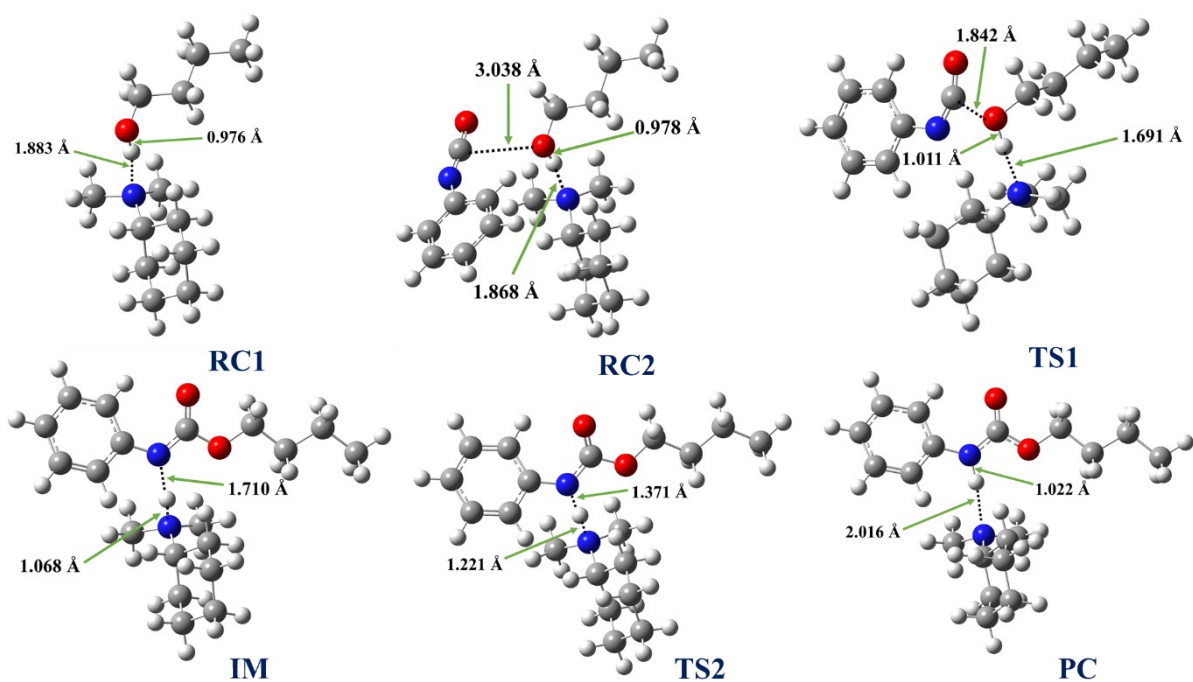

**Figure S5.** Optimized structures along the reaction pathway between phenyl isocyanate (PhNCO) and butan-1-ol in the presence of DMCHA calculated at the BHandHLYP/6-31G(d) level of theory in acetonitrile at 298.15 K and 1 atm. RC – reactant complex, TS – transition state, IM – intermediate, PC – product complex.

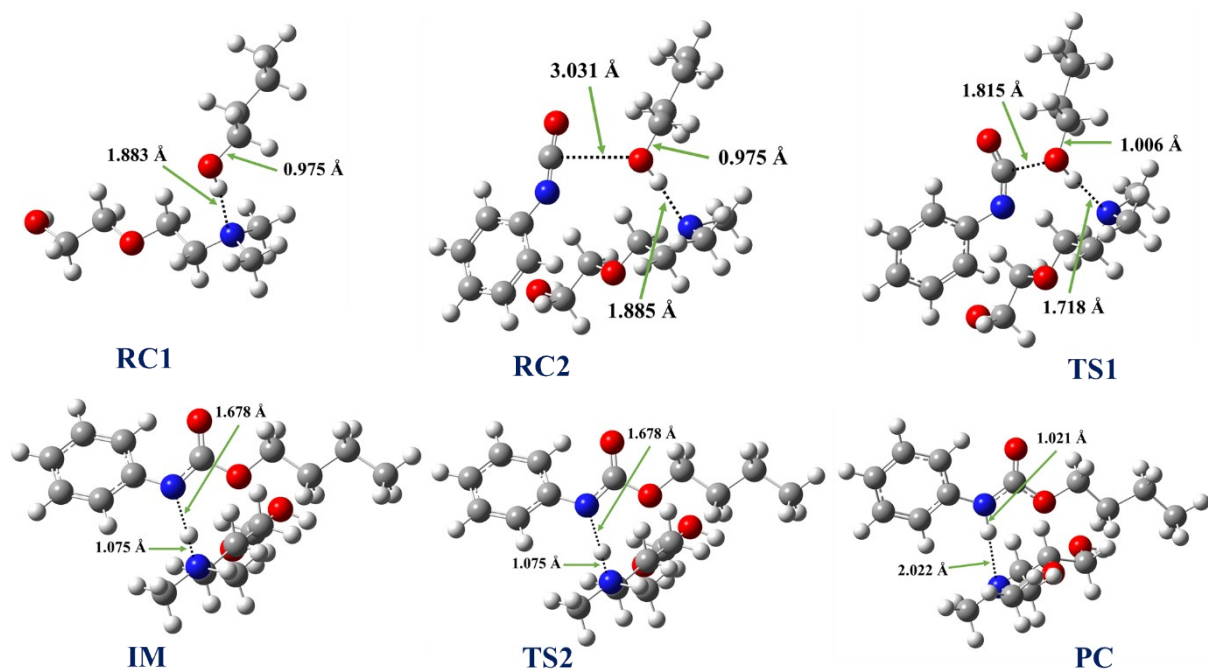

**Figure S6.** Optimized structures along the reaction pathway between phenyl isocyanate (PhNCO) and butan-1-ol in the presence of DMEE calculated at the BHandHLYP/6-31G(d) level of theory in acetonitrile at 298.15 K and 1 atm. RC – reactant complex, TS – transition state, IM – intermediate, PC – product complex.

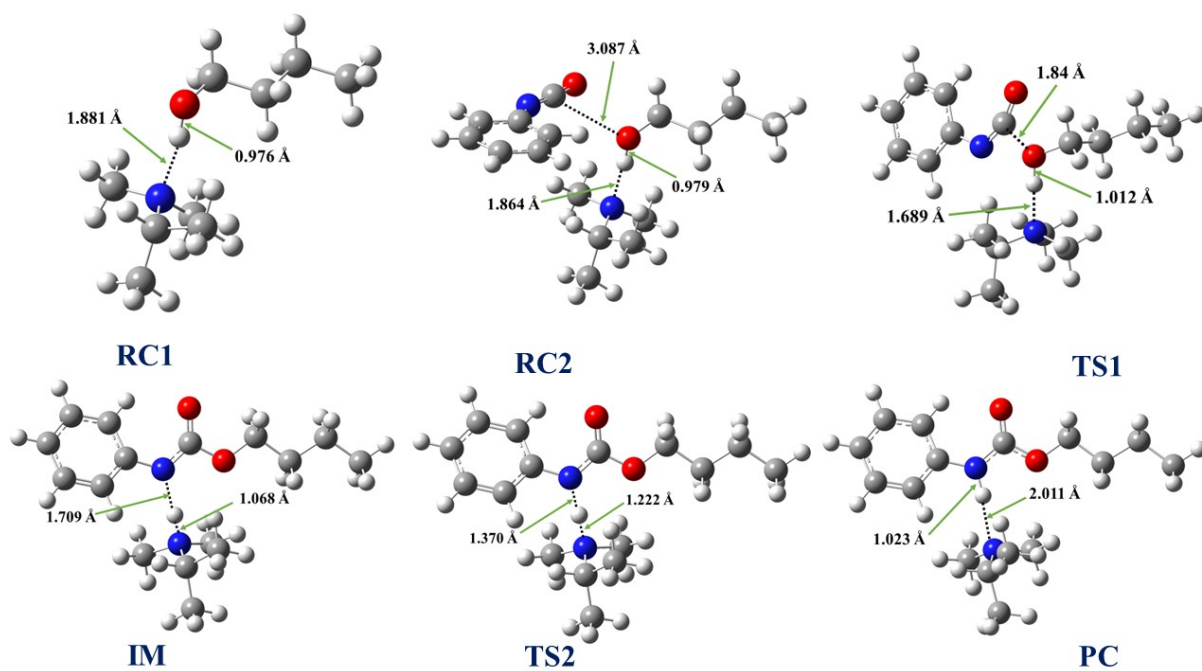

**Figure S7.** Optimized structures along the reaction pathway between phenyl isocyanate (PhNCO) and butan-1-ol in the presence of DMIPA calculated at the BHandHLYP/6-31G(d) level of theory in acetonitrile at 298.15 K and 1 atm. RC – reactant complex, TS – transition state, IM – intermediate, PC – product complex.

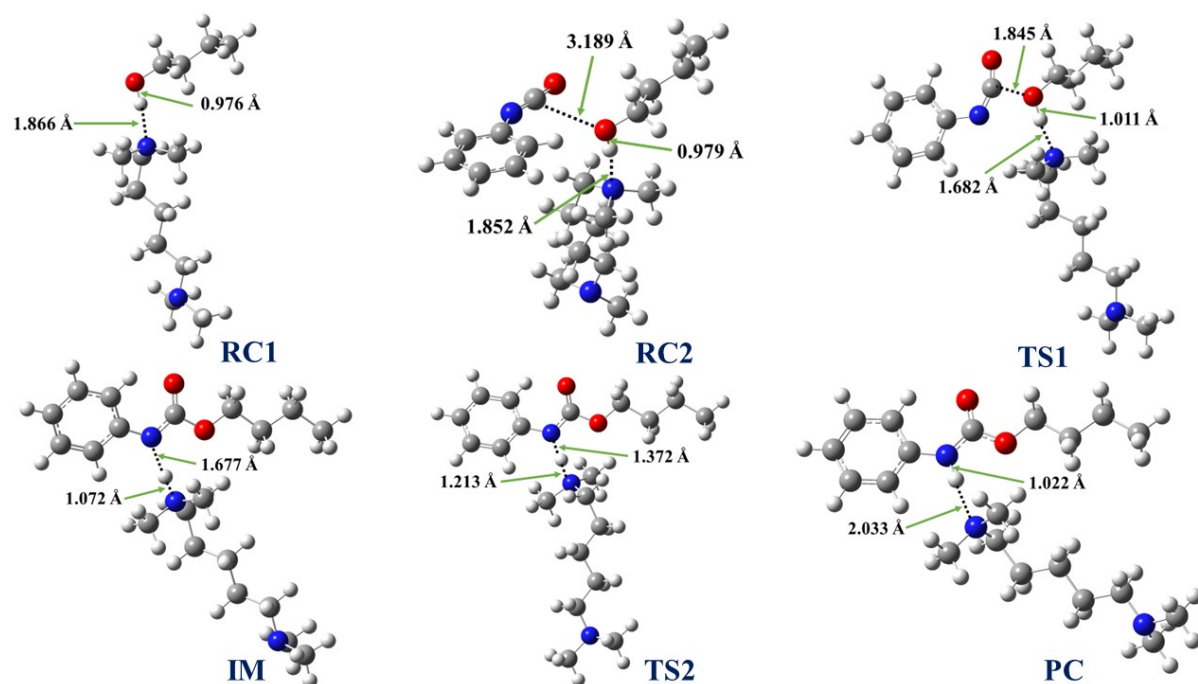

**Figure S8.** Optimized structures along the reaction pathway between phenyl isocyanate (PhNCO) and butan-1-ol in the presence of TMPD calculated at the BHandHLYP/6-31G(d) level of theory in acetonitrile at 298.15 K and 1 atm. RC – reactant complex, TS – transition state, IM – intermediate, PC – product complex.

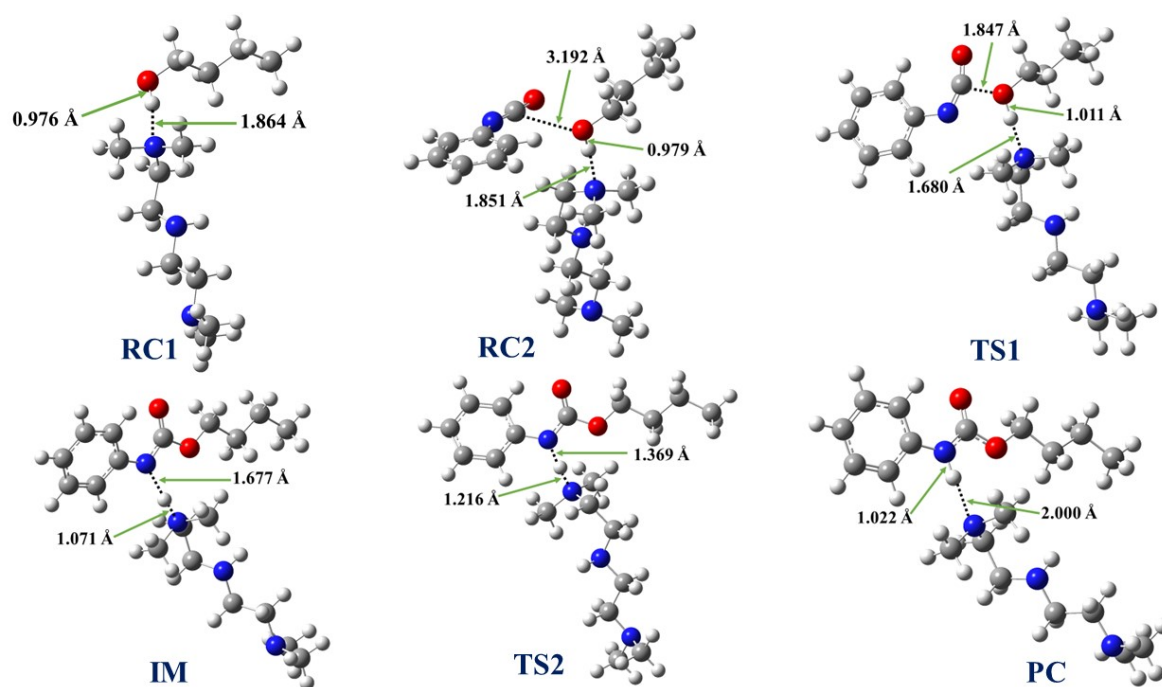

**Figure S9.** Optimized structures along the reaction pathway between phenyl isocyanate (PhNCO) and butan-1-ol in the presence of DMAEDMED calculated at the BHandHLYP/6-31G(d) level of theory in acetonitrile at 298.15 K and 1 atm. RC – reactant complex, TS – transition state, IM – intermediate, PC – product complex.

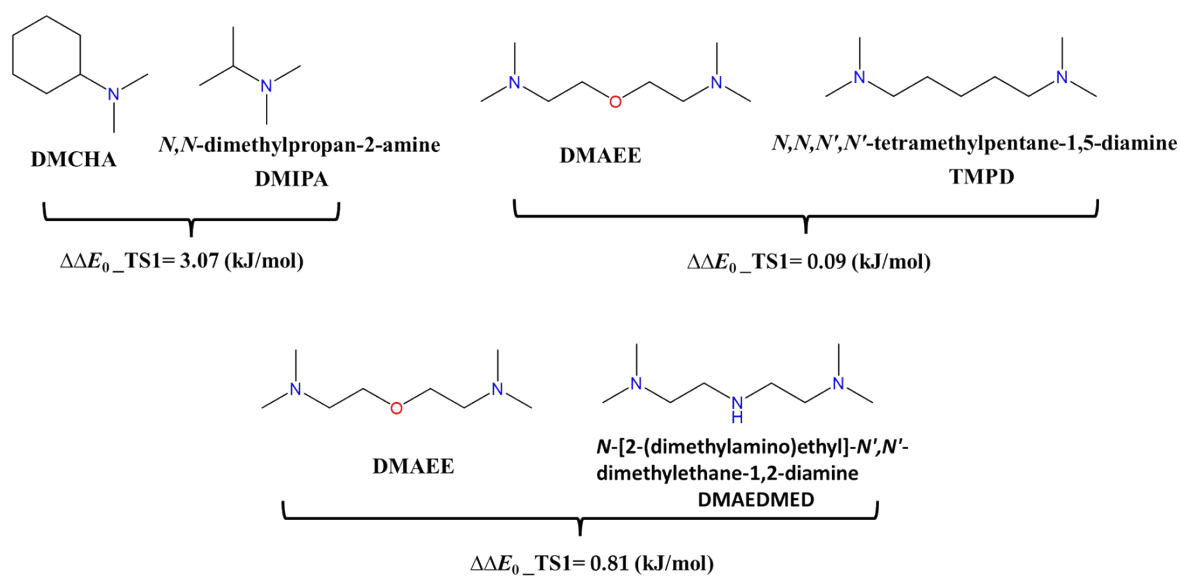

**Figure S10.** Tertiary amine catalysts used in this study.

**Table S1.** Zero-point corrected relative energies ( $\Delta E_0$ ), relative enthalpies ( $\Delta H$ ), Gibbs free energies ( $\Delta G$ ), and relative entropy ( $\Delta S$ ) of the reaction between phenyl isocyanate and butan-1-ol in presence of catalysts, calculated at the BHandHLYP/6-31G(d) level of theory in acetonitrile using the SMD implicit solvent model at 298.15 K and 1 atm. R – reactant, RC – reactant complex, TS – transition state, IM – intermediate, PC – product complex, P – product.

| $\Delta E_0$ (kJ/mol)                                    |      |        |        |        |         |         |         |         |
|----------------------------------------------------------|------|--------|--------|--------|---------|---------|---------|---------|
|                                                          | R    | RC1    | RC2    | TS1    | IM      | TS2     | PC      | P       |
| DMCHA                                                    | 0.00 | -29.29 | -51.48 | -5.40  | -104.97 | -114.39 | -130.52 | -92.58  |
| DMIPA                                                    | 0.00 | -27.11 | -45.91 | -2.33  | -101.87 | -110.46 | -127.51 | -92.58  |
| $\Delta\Delta E_0 = 3.07$                                |      |        |        |        |         |         |         |         |
| DMAEE                                                    | 0.00 | -29.04 | -43.57 | -3.07  | -100.93 | -109.33 | -127.63 | -92.58  |
| TMPD                                                     | 0.00 | -29.61 | -43.80 | -3.16  | -103.10 | -111.06 | -127.87 | -92.58  |
| DMAEDMED                                                 | 0.00 | -29.72 | -43.79 | -3.88  | -103.73 | -111.26 | -127.48 | -92.58  |
| $\Delta\Delta E_0^* = 0.09$<br>$\Delta\Delta E_0 = 0.81$ |      |        |        |        |         |         |         |         |
| $\Delta H$ (kJ/mol)                                      |      |        |        |        |         |         |         |         |
|                                                          | R    | RC1    | RC2    | TS1    | IM      | TS2     | PC      | P       |
| DMCHA                                                    | 0.00 | -28.14 | -47.16 | -5.94  | -105.63 | -116.14 | -130.65 | -94.84  |
| DMIPA                                                    | 0.00 | -25.93 | -41.37 | -2.48  | -102.78 | -112.44 | -127.55 | -94.84  |
| DMAEE                                                    | 0.00 | -27.59 | -38.67 | -3.20  | -101.62 | -111.10 | -127.92 | -94.84  |
| TMPD                                                     | 0.00 | -27.92 | -38.90 | -3.53  | -104.08 | -112.97 | -127.83 | -94.84  |
| DMAEDMED                                                 | 0.00 | -27.85 | -38.70 | -3.96  | -104.44 | -113.22 | -127.35 | -94.84  |
| $\Delta G$ (kJ/mol)                                      |      |        |        |        |         |         |         |         |
|                                                          | R    | RC1    | RC2    | TS1    | IM      | TS2     | PC      | P       |
| DMCHA                                                    | 0.00 | 15.24  | 36.85  | 95.68  | -4.69   | -9.41   | -30.65  | -41.54  |
| DMIPA                                                    | 0.00 | 15.92  | 38.62  | 93.96  | -0.79   | -6.37   | -29.69  | -41.54  |
| DMAEE                                                    | 0.00 | 12.64  | 40.66  | 94.20  | -1.46   | -6.62   | -26.62  | -41.54  |
| TMPD                                                     | 0.00 | 8.59   | 38.23  | 94.85  | -3.36   | -7.33   | -30.72  | -41.54  |
| DMAEDMED                                                 | 0.00 | 7.08   | 38.39  | 93.25  | -6.71   | -6.94   | -31.83  | -41.54  |
| $\Delta S$ (Cal/mol*Kelvin)                              |      |        |        |        |         |         |         |         |
|                                                          | R    | RC1    | RC2    | TS1    | IM      | TS2     | PC      | P       |
| DMCHA                                                    | 0.00 | -34.78 | -67.34 | -81.46 | -80.92  | -85.55  | -80.16  | -133.38 |
| DMIPA                                                    | 0.00 | -33.55 | -64.12 | -77.31 | -81.76  | -85.03  | -78.45  | -133.38 |
| DMAEE                                                    | 0.00 | -32.25 | -63.59 | -78.08 | -80.29  | -83.76  | -81.21  | -133.38 |
| TMPD                                                     | 0.00 | -29.27 | -61.83 | -78.86 | -80.74  | -84.68  | -77.85  | -133.38 |
| DMAEDMED                                                 | 0.00 | -28.00 | -61.80 | -77.93 | -78.34  | -85.20  | -76.57  | -133.38 |

\* ( $\Delta\Delta E_0 = TS1_{DMAEE} - TS1_{TMPD}$ )

**Table S2.** Cartesian coordinates of the stationary points for the reaction system studied. The calculated at the BHandHLYP/6-31G(d) level of theory in acetonitrile at 298.15 K and 1 atm. Cat.- catalysts, RC – reactant complex, TS – transition state, IM – intermediate, PC – product complex.

| DMCHA |             |             |             | DMCHA-RC1 |             |            |             |
|-------|-------------|-------------|-------------|-----------|-------------|------------|-------------|
| C     | -0.43997600 | -1.25038700 | -0.22853300 | O         | -1.46222500 | 0.67919500 | -1.68339300 |
| H     | -0.40630000 | -1.30417900 | -1.31818300 | N         | 0.57381500  | 1.23877800 | 0.23712000  |
| H     | 0.04152300  | -2.14788400 | 0.14774300  | C         | 0.78024600  | 2.63796200 | -0.09309600 |
| C     | -0.43997500 | 1.25038700  | -0.22853000 | H         | 1.56707300  | 3.11148500 | 0.50076200  |
| H     | 0.04152500  | 2.14788300  | 0.14775000  | H         | -0.14171000 | 3.18758100 | 0.08061600  |

|                   |             |             |             |                   |             |             |             |
|-------------------|-------------|-------------|-------------|-------------------|-------------|-------------|-------------|
| H                 | -0.40629900 | 1.30418300  | -1.31817900 | H                 | 1.03907200  | 2.73427600  | -1.14387700 |
| C                 | -1.89245000 | 1.24762000  | 0.24115700  | C                 | 0.14783000  | 1.10168900  | 1.61977700  |
| H                 | -2.39074300 | 2.14471500  | -0.12331600 | H                 | -0.79135000 | 1.63224800  | 1.75508200  |
| H                 | -1.91732200 | 1.29959700  | 1.33110000  | H                 | 0.86748600  | 1.51394200  | 2.33228700  |
| C                 | -1.89245100 | -1.24762000 | 0.24115300  | H                 | -0.01853600 | 0.05919600  | 1.86862900  |
| H                 | -2.39074500 | -2.14471400 | -0.12332300 | C                 | 1.70942800  | 0.38779800  | -0.15363600 |
| H                 | -1.91732400 | -1.29960100 | 1.33109600  | C                 | 2.96482600  | 0.53143900  | 0.71301500  |
| N                 | 1.69643400  | -0.00000100 | -0.31886700 | H                 | 1.97013700  | 0.71286600  | -1.16126000 |
| C                 | 0.32712700  | -0.00000100 | 0.21356200  | H                 | 2.74230700  | 0.21128500  | 1.73110600  |
| H                 | 0.36591100  | -0.00000200 | 1.31432500  | H                 | 3.27114200  | 1.57456600  | 0.76756100  |
| C                 | -2.63496700 | 0.00000100  | -0.21478000 | C                 | -2.75383100 | 0.75765700  | -1.13682500 |
| H                 | -2.71054100 | 0.00000300  | -1.30359700 | H                 | -2.87367000 | 1.67015900  | -0.54537400 |
| C                 | 2.44553400  | 1.18149600  | 0.06983600  | H                 | -3.44539400 | 0.83590300  | -1.97495800 |
| H                 | 3.46541000  | 1.09195900  | -0.29352600 | H                 | -0.80941300 | 0.81887200  | -0.97066600 |
| H                 | 2.02487100  | 2.07898800  | -0.36855700 | C                 | 1.29867200  | -1.08059800 | -0.25546100 |
| H                 | 2.48879800  | 1.32071900  | 1.15817400  | H                 | 1.01580200  | -1.45707600 | 0.72757300  |
| C                 | 2.44553500  | -1.18149500 | 0.06984200  | H                 | 0.42181200  | -1.16181500 | -0.89425500 |
| H                 | 2.48880000  | -1.32071200 | 1.15818100  | C                 | 4.10899400  | -0.31882900 | 0.16361600  |
| H                 | 2.02487200  | -2.07899100 | -0.36854500 | H                 | 4.39930500  | 0.06024800  | -0.81779400 |
| H                 | 3.46541100  | -1.09196000 | -0.29352100 | H                 | 4.98338300  | -0.22249000 | 0.80569400  |
| H                 | -3.65314600 | 0.00000100  | 0.17219800  | C                 | 2.43984600  | -1.93580300 | -0.80177600 |
|                   |             |             |             | H                 | 2.65253400  | -1.63642600 | -1.82947200 |
|                   |             |             |             | H                 | 2.13369700  | -2.98023100 | -0.83856400 |
|                   |             |             |             | C                 | 3.70529000  | -1.78411700 | 0.03629900  |
|                   |             |             |             | H                 | 3.52794000  | -2.19463600 | 1.03197100  |
|                   |             |             |             | H                 | 4.51823200  | -2.36242500 | -0.40083100 |
|                   |             |             |             | C                 | -3.12072800 | -0.45023800 | -0.29067800 |
|                   |             |             |             | H                 | -2.41588500 | -0.53130000 | 0.53862200  |
|                   |             |             |             | H                 | -2.99479700 | -1.34808600 | -0.89687200 |
|                   |             |             |             | C                 | -4.54223600 | -0.38679100 | 0.25278700  |
|                   |             |             |             | H                 | -5.24224100 | -0.30103900 | -0.57927600 |
|                   |             |             |             | H                 | -4.66187500 | 0.52010200  | 0.84688000  |
|                   |             |             |             | C                 | -4.90932200 | -1.59681400 | 1.09920800  |
|                   |             |             |             | H                 | -5.92874600 | -1.52481100 | 1.47348700  |
|                   |             |             |             | H                 | -4.83249000 | -2.51730100 | 0.52237000  |
|                   |             |             |             | H                 | -4.24681600 | -1.69022700 | 1.95849000  |
| <b>DMCHA -RC2</b> |             |             |             | <b>DMCHA -TS1</b> |             |             |             |
| O                 | 1.22283400  | -1.14192400 | -0.20315300 | O                 | 1.30069700  | -0.48679300 | -0.93392100 |
| N                 | 0.84097400  | 1.21984500  | 1.33286600  | C                 | 0.08291300  | -1.86505400 | -0.82034200 |
| C                 | 0.31810200  | 0.62084400  | 2.54921600  | N                 | 1.02084000  | 1.64566400  | 0.70103300  |
| H                 | 0.08628900  | 1.35469500  | 3.32595700  | C                 | 0.88692200  | 1.10577300  | 2.04824000  |
| H                 | 1.05302800  | -0.06975500 | 2.95514100  | H                 | 0.85667800  | 1.88215800  | 2.81475400  |
| H                 | -0.58649000 | 0.06233300  | 2.32576800  | H                 | 1.73477600  | 0.46026300  | 2.26005200  |
| C                 | 2.07721100  | 1.93193500  | 1.61158900  | H                 | -0.01973100 | 0.51292300  | 2.11682400  |
| H                 | 2.80898200  | 1.22996100  | 2.00325200  | C                 | 2.26408100  | 2.39935800  | 0.58497900  |
| H                 | 1.95404400  | 2.72902300  | 2.34962000  | H                 | 3.09829800  | 1.73481000  | 0.79118100  |
| H                 | 2.48275500  | 2.36683500  | 0.70468100  | H                 | 2.31777600  | 3.23199900  | 1.28830400  |
| C                 | -0.17427400 | 1.99418400  | 0.60010500  | H                 | 2.38172700  | 2.78777700  | -0.42044300 |
| C                 | -0.59127500 | 3.31544500  | 1.25464000  | C                 | -0.18763200 | 2.38043000  | 0.26948700  |
| H                 | -1.05354100 | 1.34996200  | 0.57742700  | C                 | -0.42402200 | 3.71215400  | 0.98714800  |
| H                 | 0.26364600  | 3.99124900  | 1.28637200  | H                 | -1.01656600 | 1.71946800  | 0.51928300  |
| H                 | -0.90303300 | 3.14803800  | 2.28394500  | H                 | 0.38637200  | 4.40231500  | 0.75281100  |
| C                 | 2.53692900  | -1.63827500 | -0.10830800 | H                 | -0.41985300 | 3.57002800  | 2.06575200  |
| H                 | 2.87700300  | -1.63233100 | 0.92931100  | C                 | 2.66742000  | -0.81172200 | -1.15660200 |
| H                 | 2.50264400  | -2.67981300 | -0.42203200 | H                 | 2.67313500  | -1.53824600 | -1.96172000 |
| H                 | 1.15822900  | -0.30167300 | 0.29499300  | C                 | -4.49027500 | -3.24362400 | 0.64113600  |
| C                 | 0.23714900  | 2.23077300  | -0.85255000 | C                 | -3.48374400 | -3.95089700 | 0.00040700  |
| H                 | 1.11547800  | 2.87502100  | -0.89225100 | C                 | -4.27519700 | -1.91348900 | 0.97360700  |
| H                 | 0.51589200  | 1.28203000  | -1.30597700 | C                 | -3.07131500 | -1.30120400 | 0.66972200  |
| C                 | -1.72256800 | 3.97892400  | 0.47103500  | C                 | -2.05515800 | -2.00692500 | 0.02599200  |
| H                 | -2.61158900 | 3.34783200  | 0.52104700  | C                 | -2.27564900 | -3.34491600 | -0.30733900 |
| H                 | -1.98777400 | 4.92761200  | 0.93549900  | H                 | -1.50624100 | -3.91000700 | -0.80519700 |
| C                 | -0.89270900 | 2.88948300  | -1.64091600 | H                 | -3.63562000 | -4.98542100 | -0.26467800 |
| H                 | -1.74021500 | 2.20396400  | -1.69368000 | H                 | -5.04711000 | -1.34831000 | 1.47164500  |
| H                 | -0.57213800 | 3.06936500  | -2.66599000 | H                 | -2.90242300 | -0.26780500 | 0.92580500  |

|           |             |             |             |            |             |             |             |
|-----------|-------------|-------------|-------------|------------|-------------|-------------|-------------|
| C         | -1.34100600 | 4.19420500  | -0.99000000 | N          | -0.86786100 | -1.30151300 | -0.24002600 |
| H         | -0.52718700 | 4.91955000  | -1.04427600 | O          | 0.60878400  | -2.78387800 | -1.34198800 |
| H         | -2.17893700 | 4.62142700  | -1.53929500 | H          | 1.17302100  | 0.28358700  | -0.29066600 |
| C         | 3.51924200  | -0.87450000 | -0.97966300 | H          | 3.16700100  | 0.08627000  | -1.51371500 |
| H         | 3.53011100  | 0.17217200  | -0.67107400 | H          | -5.42729500 | -3.72136100 | 0.87741800  |
| H         | 3.15786100  | -0.89363800 | -2.00844600 | C          | -0.21890300 | 2.58126300  | -1.24498300 |
| C         | 4.93218700  | -1.44007600 | -0.91611100 | H          | 0.59878500  | 3.23329700  | -1.55140400 |
| H         | 4.91461300  | -2.48771600 | -1.21898500 | H          | -0.07056800 | 1.62535000  | -1.74172400 |
| H         | 5.28048900  | -1.42688500 | 0.11738600  | C          | -1.74864200 | 4.33705800  | 0.55238400  |
| C         | 5.91660200  | -0.67754800 | -1.79061200 | H          | -2.57084800 | 3.69303400  | 0.86885000  |
| H         | 6.91678100  | -1.10150900 | -1.72465500 | H          | -1.88886500 | 5.29224400  | 1.05615000  |
| H         | 5.61415400  | -0.70314400 | -2.83645800 | C          | -1.54104600 | 3.20739900  | -1.68521200 |
| H         | 5.97949300  | 0.36764000  | -1.49124500 | H          | -2.35432100 | 2.51000300  | -1.47787900 |
| C         | -0.52567100 | -2.90679600 | 1.54624200  | H          | -1.53201400 | 3.36468200  | -2.76263100 |
| C         | -4.05428100 | -1.26989100 | -1.90871800 | C          | -1.80890900 | 4.52191100  | -0.96007800 |
| C         | -2.67383900 | -1.22338300 | -2.04781900 | H          | -1.06076100 | 5.25713100  | -1.26170300 |
| C         | -4.60916700 | -1.76222500 | -0.73663900 | H          | -2.77841500 | 4.92267900  | -1.25278600 |
| C         | -3.79306000 | -2.20779200 | 0.29025800  | C          | 3.35740900  | -1.37120000 | 0.07092600  |
| C         | -2.41220100 | -2.16128500 | 0.14113100  | H          | 3.30496400  | -0.64276700 | 0.88004300  |
| C         | -1.84470500 | -1.66570200 | -1.02941900 | H          | 2.81946700  | -2.25787900 | 0.40445500  |
| H         | -0.77187500 | -1.61764400 | -1.11775300 | C          | 4.81403900  | -1.72445700 | -0.20421300 |
| H         | -2.23546900 | -0.84022500 | -2.95543400 | H          | 4.86229000  | -2.44222600 | -1.02351800 |
| H         | -5.67989200 | -1.80126300 | -0.61802800 | H          | 5.34372500  | -0.83405100 | -0.54410000 |
| H         | -4.21299700 | -2.59304200 | 1.20444700  | C          | 5.51878900  | -2.29905200 | 1.01553000  |
| N         | -1.62683000 | -2.62163100 | 1.19382700  | H          | 5.03046600  | -3.21021300 | 1.35743000  |
| O         | 0.48039700  | -3.24598200 | 2.03186700  | H          | 6.55621900  | -2.54153300 | 0.79430400  |
| H         | -4.69121000 | -0.92422500 | -2.70660200 | H          | 5.51273700  | -1.59072700 | 1.84258000  |
| DMCHA -IM |             |             |             | DMCHA -TS2 |             |             |             |
| O         | 1.03440300  | -1.61394500 | -0.00660000 | O          | 1.18616000  | -1.50774800 | 0.01810300  |
| C         | -0.25025400 | -2.02665200 | -0.22892400 | C          | -0.06151500 | -1.96635900 | -0.25550300 |
| N         | -0.09607800 | 1.23313700  | 1.26164600  | N          | -0.30438500 | 1.15978600  | 1.24176900  |
| C         | -1.16663800 | 1.48815900  | 2.25113400  | C          | -1.43510500 | 1.33874400  | 2.16689600  |
| H         | -0.85970600 | 2.26540900  | 2.93879800  | H          | -1.23480900 | 2.12931200  | 2.88234500  |
| H         | -1.34537500 | 0.56974000  | 2.79712400  | H          | -1.58885400 | 0.40885400  | 2.70388000  |
| H         | -2.06861000 | 1.78361500  | 1.73184700  | H          | -2.32962400 | 1.57563200  | 1.60423900  |
| C         | 1.15430800  | 0.86947600  | 1.96280100  | C          | 0.91718500  | 0.88504700  | 2.01384100  |
| H         | 0.95730700  | -0.01543300 | 2.55445800  | H          | 0.76508500  | -0.03390900 | 2.56843400  |
| H         | 1.45699900  | 1.68177000  | 2.61129200  | H          | 1.11975500  | 1.69146800  | 2.71146600  |
| H         | 1.92867200  | 0.64853800  | 1.24500300  | H          | 1.75776900  | 0.74979200  | 1.34999200  |
| C         | 0.03310400  | 2.34368600  | 0.25333500  | C          | -0.19173100 | 2.28033100  | 0.26008900  |
| C         | 0.50824200  | 3.66118800  | 0.85356000  | C          | 0.17722100  | 3.62409800  | 0.88447000  |
| H         | -0.98157000 | 2.47566100  | -0.11429100 | H          | -1.19179900 | 2.36521000  | -0.16065100 |
| H         | 1.51944300  | 3.54588600  | 1.24066900  | H          | 1.17466000  | 3.56396700  | 1.31829800  |
| H         | -0.12631800 | 3.96150600  | 1.68316300  | H          | -0.50977500 | 3.87858300  | 1.68775100  |
| C         | 2.04990400  | -2.57975900 | -0.21939300 | C          | 2.26032100  | -2.39044600 | -0.27465200 |
| H         | 1.90777900  | -3.41992200 | 0.45703000  | H          | 2.15298900  | -3.30227900 | 0.30763300  |
| H         | 1.98450400  | -2.96548200 | -1.23376500 | H          | 2.22925100  | -2.66639400 | -1.32544800 |
| C         | -5.28435400 | -1.30793900 | -0.35345300 | C          | -5.11471800 | -1.64513300 | -0.40517600 |
| C         | -4.53524700 | -2.46074600 | -0.16788200 | C          | -4.30054600 | -2.69718300 | -0.00844000 |
| C         | -4.61649500 | -0.09312600 | -0.43754100 | C          | -4.53288900 | -0.41453500 | -0.67182800 |
| C         | -3.23781800 | -0.04032700 | -0.33887600 | C          | -3.16362300 | -0.24300800 | -0.54706300 |
| C         | -2.46016900 | -1.19575700 | -0.14998200 | C          | -2.33186600 | -1.29291500 | -0.14292100 |
| C         | -3.15290800 | -2.41675300 | -0.06783800 | C          | -2.93180700 | -2.52975500 | 0.12576800  |
| H         | -2.59605600 | -3.32434600 | 0.06713400  | H          | -2.31714800 | -3.35606200 | 0.43276400  |
| H         | -5.03248200 | -3.41673100 | -0.09695300 | H          | -4.73517400 | -3.66157300 | 0.20610300  |
| H         | -5.17159900 | 0.82081000  | -0.58562300 | H          | -5.14428200 | 0.41699600  | -0.98676700 |
| H         | -2.73064200 | 0.90876500  | -0.41703800 | H          | -2.71849300 | 0.71283000  | -0.77435500 |
| N         | -1.09194000 | -1.01855700 | -0.01523100 | N          | -0.97167300 | -1.02826700 | 0.02774000  |
| O         | -0.45456300 | -3.18009200 | -0.59027000 | O          | -0.22286700 | -3.08575000 | -0.71590000 |
| H         | -0.42096600 | 0.37405500  | 0.71643200  | H          | -0.57840800 | 0.14533800  | 0.61907700  |
| H         | -6.35881800 | -1.35409100 | -0.43167100 | H          | -6.17934900 | -1.78294200 | -0.50574900 |
| C         | 0.90831400  | 1.92328800  | -0.92183300 | C          | 0.76133200  | 1.93284500  | -0.88010000 |
| H         | 1.93508900  | 1.77943500  | -0.59038100 | H          | 1.77795300  | 1.84109400  | -0.50117700 |
| H         | 0.55871000  | 0.97564900  | -1.32255700 | H          | 0.48923900  | 0.97282000  | -1.30974900 |
| C         | 0.50012800  | 4.74933300  | -0.22074700 | C          | 0.15717500  | 4.72311700  | -0.17762000 |



|           |             |             |             |   |             |             |             |
|-----------|-------------|-------------|-------------|---|-------------|-------------|-------------|
| H         | -0.52847400 | 4.93446100  | -0.53277400 | H | -0.86377000 | 4.85090600  | -0.54034000 |
| H         | 0.87029800  | 5.67901300  | 0.20656300  | H | 0.44948900  | 5.66947500  | 0.27362600  |
| C         | 0.88678300  | 3.00790700  | -1.99707200 | C | 0.73192700  | 3.02707000  | -1.94528400 |
| H         | -0.12324100 | 3.09820000  | -2.39875600 | H | -0.26096400 | 3.06557900  | -2.39566000 |
| H         | 1.52824000  | 2.70981600  | -2.82390100 | H | 1.42859700  | 2.77693900  | -2.74322200 |
| C         | 1.33315400  | 4.35384300  | -1.43540000 | C | 1.07136700  | 4.39033800  | -1.35178100 |
| H         | 2.38327500  | 4.29087700  | -1.14613300 | H | 2.10756300  | 4.38446800  | -1.00972200 |
| H         | 1.26333800  | 5.12326000  | -2.20241200 | H | 0.99678300  | 5.16289400  | -2.11548000 |
| C         | 3.38966700  | -1.91876000 | 0.01780500  | C | 3.55377100  | -1.68226400 | 0.05963300  |
| H         | 3.48883700  | -1.06612000 | -0.65405800 | H | 3.54643300  | -1.40203400 | -1.11278700 |
| H         | 3.42136000  | -1.52690400 | 1.03435500  | H | 3.61082300  | -0.75785600 | -0.51487600 |
| C         | 4.55129100  | -2.88096400 | -0.19766900 | C | 4.77364700  | -2.54621000 | -0.23492800 |
| H         | 4.50639300  | -3.27972100 | -1.21148500 | H | 4.70780000  | -3.47229500 | 0.33671100  |
| H         | 4.44269700  | -3.73392100 | 0.47275900  | H | 4.76706700  | -2.83336300 | -1.28671200 |
| C         | 5.90590200  | -2.22682100 | 0.02958700  | C | 6.08258700  | -1.84202100 | 0.08952600  |
| H         | 6.71793300  | -2.93343700 | -0.12974400 | H | 6.13210000  | -1.57108900 | 1.14305700  |
| H         | 6.05631800  | -1.38996900 | -0.65074800 | H | 6.93801400  | -2.47772700 | -0.12983100 |
| H         | 5.99258700  | -1.84582800 | 1.04605500  | H | 6.19074700  | -0.92787500 | -0.49218300 |
| DMCHA -PC |             |             |             |   |             |             |             |
| O         | 1.47033600  | -1.50607300 | -0.00122500 |   |             |             |             |
| C         | 0.35010300  | -2.20586600 | -0.20115900 |   |             |             |             |
| N         | -0.31677100 | 1.32058900  | 1.25760700  |   |             |             |             |
| C         | -1.27658800 | 1.25069500  | 2.34521500  |   |             |             |             |
| H         | -1.18643600 | 2.07769700  | 3.05576600  |   |             |             |             |
| H         | -1.12671100 | 0.32505800  | 2.89647000  |   |             |             |             |
| H         | -2.28807400 | 1.24940700  | 1.95029700  |   |             |             |             |
| C         | 1.03502700  | 1.30700900  | 1.79056400  |   |             |             |             |
| H         | 1.19305000  | 0.37564500  | 2.32747900  |   |             |             |             |
| H         | 1.22693900  | 2.13006700  | 2.48486600  |   |             |             |             |
| H         | 1.76411100  | 1.35530900  | 0.99058100  |   |             |             |             |
| C         | -0.60131700 | 2.41473500  | 0.31691300  |   |             |             |             |
| C         | -0.34812400 | 3.82802100  | 0.85472300  |   |             |             |             |
| H         | -1.66849500 | 2.33517800  | 0.10654800  |   |             |             |             |
| H         | 0.71367700  | 3.95135100  | 1.06931000  |   |             |             |             |
| H         | -0.88110000 | 3.97919300  | 1.79172000  |   |             |             |             |
| C         | 2.69913100  | -2.19197800 | -0.25563600 |   |             |             |             |
| H         | 2.76807400  | -3.05187000 | 0.40430400  |   |             |             |             |
| H         | 2.69903500  | -2.55192100 | -1.27995300 |   |             |             |             |
| C         | -4.79054000 | -2.42670900 | -0.31810000 |   |             |             |             |
| C         | -3.84752700 | -3.43639600 | -0.20604700 |   |             |             |             |
| C         | -4.36554700 | -1.10608800 | -0.30602900 |   |             |             |             |
| C         | -3.02024100 | -0.80271700 | -0.18981600 |   |             |             |             |
| C         | -2.07142200 | -1.81873000 | -0.07236700 |   |             |             |             |
| C         | -2.49734500 | -3.14607600 | -0.07873500 |   |             |             |             |
| H         | -1.77896200 | -3.93814500 | 0.00970000  |   |             |             |             |
| H         | -4.16032300 | -4.46865200 | -0.21052600 |   |             |             |             |
| H         | -5.08127500 | -0.30429400 | -0.39497500 |   |             |             |             |
| H         | -2.69604400 | 0.22499400  | -0.19523500 |   |             |             |             |
| N         | -0.73059500 | -1.43847600 | 0.07778500  |   |             |             |             |
| O         | 0.34139500  | -3.35527500 | -0.58033100 |   |             |             |             |
| H         | -0.54938800 | -0.47513000 | 0.36959200  |   |             |             |             |
| H         | -5.83767000 | -2.66377900 | -0.41379000 |   |             |             |             |
| C         | 0.12691500  | 2.21812500  | -1.01192400 |   |             |             |             |
| H         | 1.20396000  | 2.28719000  | -0.86044400 |   |             |             |             |
| H         | -0.07706900 | 1.21843100  | -1.39150800 |   |             |             |             |
| C         | -0.77589500 | 4.88441400  | -0.16226800 |   |             |             |             |
| H         | -1.85593700 | 4.82573400  | -0.30843800 |   |             |             |             |
| H         | -0.56833600 | 5.87999700  | 0.22740500  |   |             |             |             |
| C         | -0.29538800 | 3.27185700  | -2.03360200 |   |             |             |             |
| H         | -1.35190500 | 3.13787000  | -2.27197900 |   |             |             |             |
| H         | 0.25460600  | 3.12731900  | -2.96229000 |   |             |             |             |
| C         | -0.07652100 | 4.68528700  | -1.50288200 |   |             |             |             |
| H         | 0.99364700  | 4.85988300  | -1.37803200 |   |             |             |             |
| H         | -0.43150200 | 5.41832500  | -2.22610200 |   |             |             |             |
| C         | 3.82969600  | -1.21986000 | -0.01480300 |   |             |             |             |

|   |             |             |                  |             |             |                  |             |            |             |
|---|-------------|-------------|------------------|-------------|-------------|------------------|-------------|------------|-------------|
|   |             | H           | 3.70339200       | -0.35855000 | -0.66996800 |                  |             |            |             |
|   |             | H           | 3.77420800       | -0.85355500 | 1.00963800  |                  |             |            |             |
|   |             | C           | 5.19012000       | -1.86064000 | -0.26094400 |                  |             |            |             |
|   |             | H           | 5.30536400       | -2.72551200 | 0.39256100  |                  |             |            |             |
|   |             | H           | 5.23203900       | -2.23861600 | -1.28261800 |                  |             |            |             |
|   |             | C           | 6.34086200       | -0.89280800 | -0.03039200 |                  |             |            |             |
|   |             | H           | 7.30083000       | -1.37204500 | -0.21098000 |                  |             |            |             |
|   |             | H           | 6.26905700       | -0.03268400 | -0.69417000 |                  |             |            |             |
|   |             | H           | 6.34256600       | -0.52153200 | 0.99321000  |                  |             |            |             |
|   |             |             | <b>DMEE</b>      |             |             | <b>DMEE -RC1</b> |             |            |             |
| N | 2.64711800  | 0.01262900  | -0.30549100      | O           | 1.63057200  | -0.38043900      | 1.71964100  |            |             |
| C | 3.69167600  | -0.97261200 | -0.11541600      | C           | 2.90240100  | 0.07547300       | 1.33384200  |            |             |
| H | 3.87412400  | -1.20192400 | 0.94231700       | H           | 3.50732800  | -0.74558700      | 0.93801000  |            |             |
| H | 4.62216400  | -0.60732100 | -0.54286200      | H           | 1.25628100  | -0.90563600      | 0.98776200  |            |             |
| H | 3.42676700  | -1.89799500 | -0.62023800      | H           | 3.40045500  | 0.42366500       | 2.23793100  |            |             |
| C | 3.03372800  | 1.27554700  | 0.29195400       | N           | 0.46266300  | -2.04743800      | -0.28291300 |            |             |
| H | 3.97583900  | 1.60690000  | -0.13715300      | C           | 0.82797000  | -3.37097800      | 0.19266000  |            |             |
| H | 3.16296800  | 1.20402200  | 1.37969700       | C           | 0.94838200  | -1.84412100      | -1.63813100 |            |             |
| H | 2.29176600  | 2.04187500  | 0.09110000       | C           | -0.97443400 | -1.83816500      | -0.16920600 |            |             |
| C | 1.37693000  | -0.47403200 | 0.20124600       | H           | 0.52486100  | -3.48585400      | 1.22933900  |            |             |
| C | 0.19423100  | 0.32030800  | -0.31768600      | H           | 0.36041300  | -4.16801500      | -0.39485300 |            |             |
| H | 1.35157500  | -0.48505500 | 1.29845000       | H           | 0.75151200  | -0.82996100      | -1.96878200 |            |             |
| H | 1.24913400  | -1.50131900 | -0.13078800      | H           | 0.48156300  | -2.53479600      | -2.34866700 |            |             |
| H | 0.21605300  | 0.34044200  | -1.40954000      | H           | -1.28655900 | -2.17991400      | 0.81390000  |            |             |
| H | 0.21635700  | 1.35350500  | 0.03195700       | H           | 2.02254800  | -2.00307100      | -1.66370500 |            |             |
| O | -0.97271600 | -0.31209300 | 0.14207600       | H           | 1.90584900  | -3.49350700      | 0.13453200  |            |             |
| C | -2.14930200 | 0.33410900  | -0.25657700      | H           | -1.52245500 | -2.43073500      | -0.90974000 |            |             |
| H | -2.17526800 | 1.36070800  | 0.11616100       | C           | -1.37155100 | -0.37953500      | -0.29172800 |            |             |
| H | -2.22098200 | 0.37581500  | -1.34589200      | H           | -1.17276600 | 0.01143000       | -1.29044900 |            |             |
| C | -3.31835100 | -0.44082300 | 0.30180500       | H           | -0.79998200 | 0.21894700       | 0.42025600  |            |             |
| H | -3.28577500 | -1.46477000 | -0.07261600      | O           | -2.74607500 | -0.30054200      | -0.01462800 |            |             |
| H | -3.24000500 | -0.48035500 | 1.38905000       | C           | -3.26010200 | 0.99971500       | -0.10303900 |            |             |
| O | -4.49272100 | 0.22138200  | -0.10742400      | H           | -3.12290600 | 1.40048900       | -1.11198600 |            |             |
| H | -5.24451200 | -0.26222600 | 0.23962700       | H           | -2.74769500 | 1.67013300       | 0.59048900  |            |             |
|   |             |             |                  |             |             | C                | -4.73470200 | 0.94523000 | 0.23590900  |
|   |             |             |                  |             |             | H                | -4.86109400 | 0.57636500 | 1.24943600  |
|   |             |             |                  |             |             | H                | -5.23964800 | 0.25059700 | -0.43607900 |
|   |             |             |                  |             |             | O                | -5.32132400 | 2.22486100 | 0.19444800  |
|   |             |             |                  |             |             | H                | -5.34020000 | 2.51345600 | -0.72095500 |
|   |             |             |                  |             |             | C                | 2.84900600  | 1.20513400 | 0.31871700  |
|   |             |             |                  |             |             | H                | 2.33313800  | 0.85406800 | -0.57674700 |
|   |             |             |                  |             |             | H                | 2.24381400  | 2.01291900 | 0.73189300  |
|   |             |             |                  |             |             | C                | 4.22723100  | 1.73146500 | -0.05982800 |
|   |             |             |                  |             |             | H                | 4.82701300  | 0.91552200 | -0.46501400 |
|   |             |             |                  |             |             | H                | 4.74216600  | 2.07121400 | 0.83965700  |
|   |             |             |                  |             |             | C                | 4.17275100  | 2.86793800 | -1.07019500 |
|   |             |             |                  |             |             | H                | 5.17019800  | 3.22312700 | -1.32203400 |
|   |             |             |                  |             |             | H                | 3.69168200  | 2.54955000 | -1.99392500 |
|   |             |             |                  |             |             | H                | 3.60875100  | 3.71368000 | -0.67957100 |
|   |             |             |                  |             |             |                  |             |            |             |
|   |             |             | <b>DMEE -RC2</b> |             |             | <b>DMEE -TS1</b> |             |            |             |
| O | -2.19660300 | -0.81476100 | 1.19272300       | O           | -2.04938200 | -0.95369800      | 0.82757700  |            |             |
| C | 0.06088200  | -2.63666500 | 0.31382500       | C           | -0.74703200 | -2.06857900      | 0.23115600  |            |             |
| C | -3.46652300 | -1.20104600 | 0.73340800       | C           | -3.33825300 | -1.03039900      | 0.22817800  |            |             |
| H | -4.25424100 | -0.68889900 | 1.29434300       | H           | -4.04724700 | -0.57217900      | 0.91386300  |            |             |
| C | 4.94787700  | -1.06481300 | 0.70191000       | C           | 4.15681300  | -2.95932600      | -0.06254900 |            |             |
| C | 4.39668100  | -1.92428000 | -0.23898700      | C           | 3.07272000  | -3.82077400      | -0.14272800 |            |             |
| C | 4.13825000  | -0.51405100 | 1.68481200       | C           | 3.93499300  | -1.61648500      | 0.20999100  |            |             |
| C | 2.78676000  | -0.81681500 | 1.73067900       | C           | 2.64828000  | -1.14177900      | 0.40119700  |            |             |
| C | 2.24180300  | -1.67912400 | 0.78793300       | C           | 1.55456700  | -2.00395900      | 0.31927700  |            |             |
| C | 3.04807600  | -2.23534100 | -0.20143200      | C           | 1.78101600  | -3.35398900      | 0.04551100  |            |             |
| H | 2.61741600  | -2.90397400 | -0.92925500      | H           | 0.95048900  | -4.03643900      | -0.01889900 |            |             |
| H | 5.01780600  | -2.35731200 | -1.00636700      | H           | 3.22913500  | -4.86738100      | -0.35201500 |            |             |
| H | 4.55712800  | 0.15350000  | 2.42028400       | H           | 4.76773300  | -0.93390000      | 0.27538900  |            |             |
| H | 2.14980900  | -0.39549300 | 2.49043400       | H           | 2.47153900  | -0.09761400      | 0.60528300  |            |             |
| N | 0.87842200  | -1.96056700 | 0.86493400       | N           | 0.28661900  | -1.44167700      | 0.54854300  |            |             |

|          |             |             |             |           |             |             |             |
|----------|-------------|-------------|-------------|-----------|-------------|-------------|-------------|
| O        | -0.79286200 | -3.27736500 | -0.15258900 | O         | -1.31205600 | -2.99366100 | -0.23971800 |
| H        | -2.14580500 | 0.15939400  | 1.19304500  | H         | -1.78230900 | -0.01276400 | 1.06563200  |
| H        | -3.56711300 | -2.26345400 | 0.94810700  | H         | -3.57139500 | -2.08708100 | 0.16304300  |
| H        | 5.99881600  | -0.82821900 | 0.66909300  | H         | 5.15891800  | -3.32853000 | -0.20957900 |
| N        | -1.94862900 | 2.02294700  | 1.40409100  | N         | -1.53077000 | 1.52299000  | 1.79500800  |
| C        | -2.17097800 | 2.18509100  | 2.83101300  | C         | -1.78748200 | 1.18623300  | 3.19040500  |
| C        | -2.91350500 | 2.80799200  | 0.65135100  | C         | -2.49799200 | 2.51173100  | 1.33316400  |
| C        | -0.57247300 | 2.34986900  | 1.05544800  | C         | -0.15305900 | 1.98296100  | 1.64295000  |
| H        | -1.49351100 | 1.54175500  | 3.38487900  | H         | -1.10066900 | 0.40847300  | 3.51014500  |
| H        | -2.01548900 | 3.21748500  | 3.16128700  | H         | -1.66548000 | 2.05157900  | 3.84694000  |
| H        | -2.80443000 | 2.63353000  | -0.41353600 | H         | -2.38035500 | 2.69486600  | 0.27100600  |
| H        | -2.80203300 | 3.88162600  | 0.83767500  | H         | -2.38826400 | 3.46096900  | 1.86508300  |
| H        | 0.08094700  | 1.87543100  | 1.78255700  | H         | 0.49547300  | 1.23014700  | 2.08033700  |
| H        | -3.91920100 | 2.51475600  | 0.93848400  | H         | -3.50297900 | 2.13769300  | 1.50240300  |
| H        | -3.19067500 | 1.90012700  | 3.07439000  | H         | -2.80282000 | 0.81572800  | 3.29449200  |
| H        | -0.39348900 | 3.42903400  | 1.11146900  | H         | 0.00474300  | 2.91544000  | 2.19306800  |
| C        | -0.17529900 | 1.84250100  | -0.31732900 | C         | 0.26372300  | 2.17309500  | 0.19797500  |
| H        | -0.75271800 | 2.32439300  | -1.10744800 | H         | -0.23945200 | 3.02624500  | -0.25788000 |
| H        | -0.35684800 | 0.76790200  | -0.38007500 | H         | 0.01640100  | 1.28511200  | -0.38507600 |
| O        | 1.18997200  | 2.12515200  | -0.48617600 | O         | 1.65277500  | 2.39180300  | 0.19858500  |
| C        | 1.68393300  | 1.76137500  | -1.74577300 | C         | 2.17700500  | 2.63982000  | -1.07856500 |
| H        | 1.14658100  | 2.29282500  | -2.53710900 | H         | 1.68342300  | 3.50432700  | -1.53183800 |
| H        | 1.55634200  | 0.69131100  | -1.92270100 | H         | 2.01790000  | 1.78421600  | -1.73780900 |
| C        | 3.15526600  | 2.11460400  | -1.79420400 | C         | 3.65984000  | 2.91143100  | -0.93795700 |
| H        | 3.68966000  | 1.55449200  | -1.03298300 | H         | 4.15620600  | 2.03836900  | -0.52498200 |
| H        | 3.28369700  | 3.17587200  | -1.57866800 | H         | 3.81605400  | 3.74047800  | -0.24710400 |
| O        | 3.72837500  | 1.76451200  | -3.03239000 | O         | 4.25628000  | 3.16012000  | -2.18936400 |
| H        | 3.35891400  | 2.34190200  | -3.70440100 | H         | 3.93180800  | 4.00455900  | -2.51061200 |
| C        | -3.66450100 | -0.96431500 | -0.75428200 | C         | -3.39569400 | -0.38117300 | -1.13930200 |
| H        | -3.54507000 | 0.10007300  | -0.96486400 | H         | -3.10869100 | 0.66711700  | -1.05508700 |
| H        | -2.87106100 | -1.48270700 | -1.29271200 | H         | -2.66406300 | -0.86126100 | -1.78866800 |
| C        | -5.02485200 | -1.43282200 | -1.25445100 | C         | -4.78357900 | -0.48512400 | -1.75959100 |
| H        | -5.14151100 | -2.49534000 | -1.03732700 | H         | -5.06742900 | -1.53534500 | -1.83154700 |
| H        | -5.81118300 | -0.91987600 | -0.69915300 | H         | -5.51099000 | -0.01493300 | -1.09728000 |
| C        | -5.22351900 | -1.19727100 | -2.74452400 | C         | -4.86188600 | 0.15728500  | -3.13637800 |
| H        | -4.47100900 | -1.72480600 | -3.32882800 | H         | -4.16580000 | -0.31309200 | -3.82901700 |
| H        | -6.20131700 | -1.54311500 | -3.07446300 | H         | -5.86111400 | 0.06653300  | -3.55741600 |
| H        | -5.14728600 | -0.13851300 | -2.98826000 | H         | -4.61652100 | 1.21714900  | -3.08978800 |
| DMEE -IM |             |             |             | DMEE -TS2 |             |             |             |
| N        | 0.38127300  | 0.04588200  | 2.30708300  | N         | 0.53395200  | 0.19798600  | 2.19471500  |
| C        | 1.45853100  | -0.03175100 | 3.31720700  | C         | 1.65747700  | 0.30717600  | 3.13934000  |
| C        | -0.81661400 | -0.67847700 | 2.78280100  | C         | -0.52678800 | -0.63579000 | 2.78208600  |
| C        | 0.10862700  | 1.46335000  | 1.96232500  | C         | 0.06681000  | 1.54824700  | 1.82340800  |
| H        | 2.32925100  | 0.49189700  | 2.94543300  | H         | 2.44043700  | 0.91125400  | 2.69830800  |
| H        | 1.11475800  | 0.42436900  | 4.23866900  | H         | 1.32034100  | 0.76688200  | 4.06447400  |
| H        | -1.55109900 | -0.72499400 | 1.99362100  | H         | -1.31276100 | -0.79768000 | 2.05988200  |
| H        | -1.21761700 | -0.16599900 | 3.65038000  | H         | -0.92599400 | -0.15389000 | 3.67080800  |
| H        | 1.04847200  | 1.89221700  | 1.63369400  | H         | 0.92336600  | 2.08487300  | 1.42891700  |
| H        | -0.52059900 | -1.68473300 | 3.05177600  | H         | -0.09970200 | -1.59490400 | 3.05147500  |
| H        | 1.69915100  | -1.07372000 | 3.48690100  | H         | 2.03996300  | -0.68508200 | 3.34748100  |
| H        | -0.21117700 | 1.97294700  | 2.86565700  | H         | -0.27387800 | 2.06086100  | 2.72022000  |
| C        | -0.91629800 | 1.63239200  | 0.85761300  | C         | -1.02785600 | 1.55662600  | 0.77411600  |
| H        | -1.91548300 | 1.35468400  | 1.19312200  | H         | -1.95361400 | 1.12586500  | 1.15546400  |
| H        | -0.66163700 | 1.00853000  | 0.00118400  | H         | -0.72603100 | 0.98310200  | -0.10181800 |
| O        | -0.88218900 | 2.99091200  | 0.51444200  | O         | -1.22817500 | 2.90494900  | 0.44194100  |
| C        | -1.80207900 | 3.33361900  | -0.48877300 | C         | -2.23899800 | 3.09933000  | -0.51096300 |
| H        | -2.82399700 | 3.12933000  | -0.15728800 | H         | -3.19144400 | 2.70527300  | -0.14519100 |
| H        | -1.62336300 | 2.75027700  | -1.39400600 | H         | -2.00114700 | 2.58001900  | -1.44151600 |
| C        | -1.63919800 | 4.80834200  | -0.78936400 | C         | -2.35880100 | 4.58617900  | -0.76973900 |
| H        | -0.63241200 | 4.99713400  | -1.14969700 | H         | -1.41948400 | 4.96418700  | -1.16208600 |
| H        | -1.77994700 | 5.38662300  | 0.12423400  | H         | -2.56120100 | 5.10577100  | 0.16728600  |
| O        | -2.51941400 | 5.22359100  | -1.80683800 | O         | -3.34337800 | 4.86143600  | -1.73812900 |
| H        | -3.41292900 | 5.19543400  | -1.45692800 | H         | -4.20060200 | 4.65922300  | -1.35620400 |
| O        | -0.74381000 | -1.69924200 | -0.25933500 | O         | -0.58236300 | -1.73627400 | -0.19001500 |
| C        | 0.48621100  | -1.61125800 | -0.85247100 | C         | 0.63534800  | -1.58420000 | -0.77548300 |

|          |             |             |             |             |             |             |             |
|----------|-------------|-------------|-------------|-------------|-------------|-------------|-------------|
| C        | -1.77071600 | -2.30296700 | -1.02913400 | C           | -1.54479200 | -2.47891900 | -0.92642600 |
| H        | -1.92166200 | -1.74120400 | -1.94789400 | H           | -1.73319700 | -1.98866100 | -1.87816100 |
| H        | -1.47470100 | -3.31109900 | -1.30937900 | H           | -1.15386600 | -3.47031200 | -1.13979800 |
| C        | 5.31994400  | -0.12567600 | -1.09677400 | C           | 5.32420400  | 0.24269200  | -1.18080400 |
| C        | 4.31232800  | -0.07240600 | -2.05051000 | C           | 4.27347800  | 0.28997300  | -2.08762500 |
| C        | 4.99154300  | -0.51883000 | 0.19296900  | C           | 5.07604500  | -0.20783000 | 0.10686000  |
| C        | 3.68659400  | -0.85054900 | 0.51733400  | C           | 3.80149500  | -0.60712000 | 0.47892000  |
| C        | 2.65486500  | -0.80132800 | -0.43158400 | C           | 2.73338300  | -0.55902000 | -0.42141900 |
| C        | 3.00498100  | -0.40224700 | -1.73207400 | C           | 2.99715200  | -0.10040600 | -1.71826300 |
| H        | 2.24259900  | -0.35986900 | -2.48818200 | H           | 2.19467300  | -0.05850000 | -2.43297400 |
| H        | 4.54456600  | 0.23376900  | -3.05953000 | H           | 4.44653000  | 0.64050000  | -3.09363500 |
| H        | 5.75593400  | -0.57351200 | 0.95318500  | H           | 5.87828700  | -0.25871400 | 0.82676700  |
| H        | 3.44681300  | -1.16679200 | 1.51995500  | H           | 3.62339400  | -0.97380000 | 1.47676700  |
| N        | 1.36266400  | -1.08004500 | -0.00432700 | N           | 1.45636500  | -0.90483500 | 0.03082000  |
| O        | 0.63220600  | -2.02056400 | -1.99803700 | O           | 0.85275900  | -2.05886200 | -1.87931900 |
| H        | 0.74542200  | -0.43937700 | 1.41845500  | H           | 0.95125000  | -0.34307700 | 1.20091400  |
| H        | 6.33516400  | 0.13186100  | -1.35311600 | H           | 6.31538500  | 0.55000300  | -1.47361000 |
| C        | -3.03415100 | -2.32669800 | -0.19778400 | C           | -2.80876300 | -2.56333900 | -0.10088200 |
| H        | -2.84007100 | -2.86611000 | 0.72922400  | H           | -2.57897700 | -3.03208500 | 0.85576800  |
| H        | -3.30005300 | -1.30615600 | 0.07844300  | H           | -3.16340300 | -1.55563700 | 0.11536900  |
| C        | -4.19708000 | -2.97701100 | -0.93664200 | C           | -3.90371500 | -3.35071600 | -0.80999400 |
| H        | -3.92298000 | -3.99454600 | -1.21642300 | H           | -3.54048500 | -4.35439900 | -1.03214400 |
| H        | -4.37889600 | -2.44086700 | -1.86849700 | H           | -4.12070200 | -2.88281500 | -1.77057200 |
| C        | -5.47458100 | -3.00547500 | -0.11097400 | C           | -5.18262200 | -3.44413600 | 0.00854500  |
| H        | -5.79171100 | -1.99861500 | 0.15655200  | H           | -5.94818500 | -4.01015700 | -0.51825500 |
| H        | -6.28907900 | -3.47479800 | -0.65902300 | H           | -5.00300900 | -3.93737800 | 0.96258000  |
| H        | -5.33206200 | -3.56330100 | 0.81333600  | H           | -5.58723500 | -2.45525400 | 0.21884900  |
| DMEE -PC |             |             |             |             |             |             |             |
|          | N           | -0.55226200 | -1.56440400 | 1.73128600  |             |             |             |
|          | C           | -0.86790200 | -0.91932900 | 2.99450700  |             |             |             |
|          | H           | -0.40000400 | -1.42156400 | 3.84823600  |             |             |             |
|          | H           | -1.94380900 | -0.92346700 | 3.14658900  |             |             |             |
|          | H           | -0.52851800 | 0.11216900  | 2.97519400  |             |             |             |
|          | C           | -1.07725700 | -2.92001400 | 1.71770100  |             |             |             |
|          | H           | -2.14296300 | -2.89891100 | 1.92500300  |             |             |             |
|          | H           | -0.59577500 | -3.55337700 | 2.47113800  |             |             |             |
|          | H           | -0.93406800 | -3.37912600 | 0.74510100  |             |             |             |
|          | C           | 0.88333400  | -1.53228500 | 1.48764100  |             |             |             |
|          | C           | 1.24698100  | -1.84652500 | 0.05016600  |             |             |             |
|          | H           | 1.41369700  | -2.22097800 | 2.15496500  |             |             |             |
|          | H           | 1.23704200  | -0.53016500 | 1.70385100  |             |             |             |
|          | H           | 0.71101400  | -1.17663200 | -0.62373200 |             |             |             |
|          | H           | 0.98441300  | -2.87075800 | -0.21857500 |             |             |             |
|          | O           | 2.63533100  | -1.66543000 | -0.07748300 |             |             |             |
|          | C           | 3.11916700  | -1.96733300 | -1.35745300 |             |             |             |
|          | H           | 2.89500700  | -3.00314300 | -1.62185700 |             |             |             |
|          | H           | 2.65650900  | -1.32537100 | -2.11019500 |             |             |             |
|          | C           | 4.61392100  | -1.75637000 | -1.35397600 |             |             |             |
|          | H           | 4.83488400  | -0.72127000 | -1.09000200 |             |             |             |
|          | H           | 5.06763800  | -2.39780800 | -0.59743300 |             |             |             |
|          | O           | 5.08207400  | -2.06990300 | -2.64524600 |             |             |             |
|          | H           | 6.03264100  | -1.94351100 | -2.65719000 |             |             |             |
|          | O           | 0.07491000  | 1.47148800  | 0.23304200  |             |             |             |
|          | C           | -1.14285200 | 1.61248600  | -0.29976400 |             |             |             |
|          | C           | 1.00655800  | 2.52596900  | -0.02568500 |             |             |             |
|          | H           | 1.13273200  | 2.62913300  | -1.09943700 |             |             |             |
|          | H           | 0.60299400  | 3.45806700  | 0.35803100  |             |             |             |
|          | C           | -5.85907000 | -0.30999700 | -1.12176000 |             |             |             |
|          | C           | -5.37149400 | 0.98104300  | -1.24815300 |             |             |             |
|          | C           | -5.01606700 | -1.30090600 | -0.63921900 |             |             |             |
|          | C           | -3.70983400 | -1.00430700 | -0.29365300 |             |             |             |
|          | C           | -3.21945000 | 0.29625500  | -0.41874200 |             |             |             |
|          | C           | -4.06587100 | 1.29448600  | -0.89992400 |             |             |             |
|          | H           | -3.70368400 | 2.29883600  | -1.00317300 |             |             |             |
|          | H           | -6.01264300 | 1.76490400  | -1.61966700 |             |             |             |

|                  |             |             |             |                   |             |             |             |
|------------------|-------------|-------------|-------------|-------------------|-------------|-------------|-------------|
| H                | -5.37220500 | -2.31335900 | -0.53364000 |                   |             |             |             |
| H                | -3.05869600 | -1.78143600 | 0.07107500  |                   |             |             |             |
| N                | -1.89526400 | 0.52081000  | -0.02270400 |                   |             |             |             |
| O                | -1.48358500 | 2.58582300  | -0.93287000 |                   |             |             |             |
| H                | -1.43177100 | -0.23144000 | 0.48955600  |                   |             |             |             |
| H                | -6.87602700 | -0.54080700 | -1.39431700 |                   |             |             |             |
| C                | 2.30955100  | 2.16845200  | 0.64927100  |                   |             |             |             |
| H                | 2.13941300  | 2.06836500  | 1.72099000  |                   |             |             |             |
| H                | 2.64385100  | 1.19678100  | 0.28775900  |                   |             |             |             |
| C                | 3.38378200  | 3.21886500  | 0.39456400  |                   |             |             |             |
| H                | 3.03097600  | 4.18955500  | 0.74371300  |                   |             |             |             |
| H                | 3.54469900  | 3.31781000  | -0.67910700 |                   |             |             |             |
| C                | 4.70155600  | 2.88302600  | 1.07611500  |                   |             |             |             |
| H                | 5.45255300  | 3.64532700  | 0.87929100  |                   |             |             |             |
| H                | 4.57799800  | 2.80957800  | 2.15543100  |                   |             |             |             |
| H                | 5.09462800  | 1.93084500  | 0.72296500  |                   |             |             |             |
| <b>DMAEE</b>     |             |             |             | <b>DMAEE -RC1</b> |             |             |             |
| O                | -0.34201800 | -0.37008200 | -0.33056700 | O                 | -3.90249300 | -1.56314100 | -0.10865300 |
| N                | 3.20551300  | 0.19720400  | 0.38571500  | C                 | -4.52060000 | -0.45112100 | 0.48469900  |
| N                | -3.36204400 | 0.31896000  | -0.23894700 | H                 | -5.58872400 | -0.66337500 | 0.51560500  |
| C                | 4.01640600  | 1.37470000  | 0.15347200  | H                 | -2.93758800 | -1.48537000 | 0.02050100  |
| C                | 3.91360900  | -0.99225100 | -0.04447300 | H                 | -4.19510200 | -0.32756700 | 1.52212800  |
| C                | -3.82133800 | 0.27726300  | 1.13011300  | O                 | 1.65411700  | -0.29141800 | -0.43672300 |
| C                | -2.68602700 | 1.56121900  | -0.54370100 | N                 | 5.13827000  | 0.57409700  | 0.29170500  |
| C                | 1.90703500  | 0.32950400  | -0.24998500 | N                 | -1.08467300 | -1.52818200 | 0.25311500  |
| C                | -2.66377400 | -0.88112700 | -0.66204900 | C                 | 5.69484000  | 1.27824700  | 1.42843900  |
| C                | 0.89145700  | -0.67011300 | 0.26860500  | C                 | 5.71395600  | 1.07511600  | -0.94057200 |
| C                | -1.36891700 | -1.25422800 | 0.04149900  | C                 | -0.86388400 | -2.94620500 | 0.46243200  |
| H                | 3.50972500  | 2.25687200  | 0.53605800  | C                 | -0.70923700 | -0.74948400 | 1.42013900  |
| H                | 4.23236700  | 1.54064800  | -0.90977700 | C                 | 3.68848300  | 0.64732200  | 0.29759400  |
| H                | 4.11076300  | -0.99670700 | -1.12437500 | C                 | -0.55469900 | -1.03249600 | -1.01087200 |
| H                | 3.34986800  | -1.88736900 | 0.19847700  | C                 | 3.04334700  | -0.36445700 | -0.62941400 |
| H                | -4.35996600 | -0.65003800 | 1.31228800  | C                 | 0.93533900  | -1.16725600 | -1.26687100 |
| H                | -3.01711200 | 0.35250900  | 1.87123600  | H                 | 5.30565300  | 0.85890800  | 2.35260200  |
| H                | -2.36807700 | 1.56171800  | -1.58311700 | H                 | 5.46611600  | 2.35166400  | 1.41892300  |
| H                | -1.80483600 | 1.74675100  | 0.07596200  | H                 | 5.46762800  | 2.12936700  | -1.12195800 |
| H                | 1.97579100  | 0.23983500  | -1.34175700 | H                 | 5.36892800  | 0.49723700  | -1.79208100 |
| H                | 1.52411800  | 1.32418600  | -0.03567800 | H                 | -1.17812300 | -3.50099600 | -0.41791400 |
| H                | -2.45517300 | -0.79386300 | -1.72719000 | H                 | 0.18017200  | -3.19486700 | 0.67151300  |
| H                | -3.34808900 | -1.71961300 | -0.53634900 | H                 | -0.89920600 | 0.30366700  | 1.23372700  |
| H                | 0.82237000  | -0.59293300 | 1.35625900  | H                 | 0.34145200  | -0.86286500 | 1.68950400  |
| H                | 1.17748400  | -1.69595400 | 0.02970600  | H                 | 3.32845000  | 1.65222800  | 0.04194400  |
| H                | -1.10113900 | -2.27539600 | -0.24491100 | H                 | 3.34294300  | 0.43201800  | 1.30567800  |
| H                | -1.49624600 | -1.24973200 | 1.12628200  | H                 | -0.82537100 | 0.01758500  | -1.09693000 |
| H                | 4.96506500  | 1.27516100  | 0.67511600  | H                 | -1.06822000 | -1.56576100 | -1.80934700 |
| H                | 4.86833500  | -1.05250200 | 0.47155000  | H                 | 3.41301300  | -1.36537700 | -0.39491900 |
| H                | -4.50545600 | 1.10478700  | 1.30793200  | H                 | 3.28087700  | -0.16222900 | -1.67507100 |
| H                | -3.37863600 | 2.38934900  | -0.40144400 | H                 | 1.12433800  | -0.92621500 | -2.31662800 |
|                  |             |             |             | H                 | 1.26858100  | -2.19518300 | -1.11064100 |
|                  |             |             |             | H                 | 6.77634700  | 1.16760200  | 1.43458500  |
|                  |             |             |             | H                 | 6.79637300  | 0.98585600  | -0.89738900 |
|                  |             |             |             | H                 | -1.46145900 | -3.28052500 | 1.30698300  |
|                  |             |             |             | H                 | -1.31709900 | -1.06332100 | 2.26585900  |
|                  |             |             |             | C                 | -4.28397100 | 0.84103900  | -0.27990100 |
|                  |             |             |             | H                 | -3.21116600 | 1.03943000  | -0.31838900 |
|                  |             |             |             | H                 | -4.61211600 | 0.69839600  | -1.31014700 |
|                  |             |             |             | C                 | -5.00123800 | 2.03703700  | 0.33237900  |
|                  |             |             |             | H                 | -6.07202400 | 1.83309000  | 0.37166300  |
|                  |             |             |             | H                 | -4.67639500 | 2.16276500  | 1.36599300  |
|                  |             |             |             | C                 | -4.76112700 | 3.33007500  | -0.43298800 |
|                  |             |             |             | H                 | -5.10749900 | 3.24729300  | -1.46214700 |
|                  |             |             |             | H                 | -5.28503100 | 4.16618100  | 0.02630700  |
|                  |             |             |             | H                 | -3.70118300 | 3.57853600  | -0.46105700 |
| <b>DMAEE-RC2</b> |             |             |             | <b>DMAEE -TS1</b> |             |             |             |

|           |             |             |             |            |             |             |             |
|-----------|-------------|-------------|-------------|------------|-------------|-------------|-------------|
| O         | -2.26041200 | 1.40909000  | 0.68597500  | O          | -1.91294100 | 1.55906500  | 1.17189500  |
| C         | -2.64470100 | -0.07574300 | -2.10459300 | C          | -3.37737900 | 0.74052900  | 0.39774100  |
| C         | -2.32542100 | 2.79168700  | 0.93967900  | C          | -1.72100700 | 2.94370900  | 0.90917000  |
| H         | -3.38133100 | 3.05613100  | 0.95940200  | H          | -2.69062200 | 3.40957000  | 1.04604600  |
| C         | -5.08433200 | -3.36263400 | 1.12520000  | C          | -5.47891600 | -3.57925300 | -0.96658500 |
| C         | -4.59729900 | -2.10288800 | 1.44502400  | C          | -5.94207200 | -2.27390200 | -1.04005500 |
| C         | -4.91548900 | -3.85753400 | -0.15962400 | C          | -4.21790600 | -3.82022000 | -0.43956900 |
| C         | -4.26519300 | -3.10070700 | -1.12051900 | C          | -3.43281500 | -2.77081100 | 0.00662800  |
| C         | -3.78335200 | -1.83944100 | -0.79172100 | C          | -3.89290600 | -1.45621400 | -0.06404500 |
| C         | -3.94591900 | -1.33303900 | 0.49467900  | C          | -5.16206400 | -1.21784400 | -0.59536900 |
| H         | -3.55733100 | -0.35594200 | 0.73462400  | H          | -5.53876300 | -0.21133700 | -0.66061100 |
| H         | -4.72422900 | -1.71272600 | 2.44224500  | H          | -6.92001400 | -2.07031400 | -1.44717600 |
| H         | -5.28953300 | -4.83498700 | -0.41795400 | H          | -3.84197900 | -4.82905000 | -0.37448900 |
| H         | -4.12794700 | -3.47456900 | -2.12147900 | H          | -2.45372000 | -2.95598200 | 0.41772800  |
| N         | -3.13563100 | -1.10999100 | -1.78315300 | N          | -3.02563700 | -0.45693000 | 0.41370200  |
| O         | -2.14172100 | 0.87153600  | -2.56718400 | O          | -4.13430900 | 1.61777700  | 0.17403700  |
| H         | -1.34312300 | 1.09859700  | 0.82924200  | H          | -1.04729900 | 1.03905300  | 1.14182900  |
| H         | -5.59018700 | -3.95351600 | 1.87139000  | H          | -1.05099700 | 3.33646500  | 1.67106600  |
| H         | -1.92352400 | 3.02098100  | 1.93051100  | H          | -6.09097200 | -4.39571200 | -1.31417100 |
| O         | 3.00527800  | -0.54614700 | -0.06637200 | O          | 3.08073100  | -0.59380900 | -0.06667600 |
| N         | 6.62283300  | -1.11618600 | 0.00977700  | N          | 6.69239700  | -1.18917200 | -0.22056100 |
| N         | 0.29274700  | 0.29744400  | 1.16765900  | N          | 0.42327400  | 0.22851400  | 1.29314700  |
| C         | 7.68698600  | -0.22098600 | 0.41514600  | C          | 7.78718900  | -0.32683500 | 0.17458600  |
| C         | 6.97008500  | -1.77931500 | -1.23152700 | C          | 6.95986600  | -1.77708500 | -1.51836400 |
| C         | -0.04668100 | -0.61671800 | 2.24182900  | C          | 0.16347400  | -0.72583700 | 2.36049400  |
| C         | 1.26630500  | 1.28740000  | 1.59526500  | C          | 1.41726400  | 1.21345600  | 1.70031100  |
| C         | 5.35790900  | -0.40894000 | -0.07455000 | C          | 5.43138600  | -0.47068400 | -0.18786500 |
| C         | 0.61337000  | -0.36992300 | -0.08866700 | C          | 0.69122400  | -0.40039000 | -0.00004200 |
| C         | 4.16226400  | -1.34059000 | -0.11730500 | C          | 4.22771100  | -1.39253900 | -0.20721200 |
| C         | 1.81755400  | -1.29390400 | -0.12375300 | C          | 1.88520700  | -1.32952900 | -0.11040000 |
| H         | 7.45028100  | 0.22694500  | 1.37672800  | H          | 7.61240600  | 0.06181900  | 1.17445100  |
| H         | 7.85905400  | 0.58946900  | -0.30467800 | H          | 7.92354100  | 0.52563800  | -0.50306900 |
| H         | 7.07596900  | -1.07683500 | -2.06837700 | H          | 7.02457400  | -1.02480200 | -2.31516200 |
| H         | 6.21754500  | -2.51339200 | -1.50143600 | H          | 6.18498500  | -2.48748000 | -1.78854300 |
| H         | -0.80515200 | -1.31736000 | 1.90250700  | H          | -0.59461800 | -1.43446600 | 2.04177900  |
| H         | 0.80978800  | -1.18728300 | 2.61081000  | H          | 1.05566400  | -1.27782200 | 2.66126300  |
| H         | 1.49040100  | 1.95959200  | 0.77218600  | H          | 1.58299900  | 1.91999600  | 0.89280900  |
| H         | 2.20291300  | 0.84470000  | 1.93595300  | H          | 2.37245700  | 0.76024900  | 1.96029300  |
| H         | 5.32292300  | 0.26373300  | -0.94119600 | H          | 5.34873500  | 0.24713400  | -1.01407500 |
| H         | 5.25627600  | 0.21002100  | 0.81343300  | H          | 5.39035900  | 0.10082700  | 0.73607000  |
| H         | 0.74644000  | 0.39590300  | -0.84975700 | H          | 0.80266500  | 0.39224800  | -0.73617900 |
| H         | -0.25635700 | -0.96047400 | -0.37185300 | H          | -0.19518100 | -0.97047800 | -0.26733500 |
| H         | 4.19901600  | -2.02442500 | 0.73383100  | H          | 4.30102700  | -2.11089400 | 0.61242800  |
| H         | 4.15339100  | -1.94562200 | -1.02548000 | H          | 4.16909500  | -1.95954500 | -1.13759100 |
| H         | 1.78222600  | -1.86582800 | -1.05506000 | H          | 1.80990600  | -1.86208700 | -1.06214800 |
| H         | 1.78420600  | -2.01502700 | 0.69543900  | H          | 1.87397200  | -2.08342800 | 0.67897400  |
| H         | 8.61494900  | -0.77775800 | 0.51902100  | H          | 7.90409900  | -2.31444500 | -1.48578900 |
| H         | 7.91483200  | -2.30314400 | -1.11094200 | H          | 8.71441200  | -0.89420000 | 0.18810900  |
| H         | -0.45425600 | -0.05149900 | 3.07636100  | H          | 1.04213000  | 1.75523000  | 2.56494800  |
| H         | 0.84435200  | 1.87018700  | 2.41088900  | H          | -0.21039400 | -0.19174600 | 3.23003800  |
| C         | -1.61043000 | 3.62402000  | -0.11043100 | C          | -1.18724100 | 3.21756200  | -0.48229900 |
| H         | -0.55798200 | 3.33578500  | -0.13568800 | H          | -0.23462200 | 2.70347900  | -0.61269000 |
| H         | -2.02458600 | 3.37749600  | -1.08756900 | H          | -1.87787200 | 2.79900100  | -1.21379500 |
| C         | -1.72207800 | 5.12157200  | 0.14407200  | C          | -1.00334400 | 4.70811100  | -0.74012200 |
| H         | -2.77504700 | 5.40457000  | 0.17427200  | H          | -1.95621000 | 5.21833200  | -0.59664400 |
| H         | -1.31555800 | 5.35250700  | 1.12951600  | H          | -0.31898300 | 5.12109700  | 0.00146700  |
| C         | -1.00481300 | 5.95677800  | -0.90633900 | C          | -0.47597200 | 5.00267300  | -2.13627600 |
| H         | -1.41261800 | 5.77322200  | -1.89927100 | H          | -1.15649300 | 4.62878500  | -2.89963600 |
| H         | -1.10096300 | 7.02114400  | -0.70047500 | H          | -0.35516100 | 6.07238100  | -2.29477600 |
| H         | 0.05775800  | 5.72013500  | -0.93765600 | H          | 0.49258900  | 4.53195300  | -2.29785400 |
| DMAEE -IM |             |             |             | DMAEE -TS2 |             |             |             |
| O         | -1.40079100 | 1.74848200  | -0.08248500 | O          | 2.46463900  | 1.38356000  | -0.06421300 |
| C         | -2.70352600 | 1.33570900  | -0.00051200 | C          | 3.16775800  | 0.22266600  | -0.15836500 |
| C         | 0.25246900  | -0.66289200 | 1.36356700  | C          | 3.22421600  | 2.58394100  | -0.11958300 |
| C         | -0.56913500 | -2.69048000 | 0.29843700  | H          | 3.93571600  | 2.60187500  | 0.70221500  |

|          |             |             |             |             |             |             |              |
|----------|-------------|-------------|-------------|-------------|-------------|-------------|--------------|
| C        | -1.18282100 | 3.14870800  | -0.01652200 | C           | 3.65818400  | -4.82104800 | -0.21801400  |
| H        | -1.73396100 | 3.64311500  | -0.81259700 | C           | 4.44931500  | -3.85385700 | 0.38628500   |
| H        | -1.55964300 | 3.53470900  | 0.92790400  | C           | 2.45408900  | -4.43664800 | -0.78971600  |
| C        | -6.33551900 | -2.21828500 | 0.14850500  | C           | 2.05347200  | -3.11085200 | -0.75930400  |
| C        | -6.29307500 | -0.93938300 | 0.68450800  | C           | 2.83862000  | -2.12607400 | -0.14982000  |
| C        | -5.19389500 | -2.71511100 | -0.46636200 | C           | 4.05115200  | -2.52726600 | 0.42578000   |
| C        | -4.04484900 | -1.94827100 | -0.54076300 | H           | 4.67788700  | -1.79205200 | 0.89598500   |
| C        | -3.98092900 | -0.65182700 | -0.00387800 | H           | 5.38816200  | -4.13373500 | 0.83933100   |
| C        | -5.14523100 | -0.16460100 | 0.61487900  | H           | 1.82383200  | -5.16943600 | -1.26954200  |
| H        | -5.14049700 | 0.82504100  | 1.03037700  | H           | 1.12414200  | -2.81941100 | -0.122198900 |
| H        | -7.16783700 | -0.53251300 | 1.16957900  | N           | 2.33844300  | -0.82357200 | -0.10294600  |
| H        | -5.19766300 | -3.70540700 | -0.89593400 | O           | 4.38073800  | 0.24703300  | -0.29440000  |
| H        | -3.16960500 | -2.34151600 | -1.03305400 | H           | 1.01469500  | -0.59532000 | 0.21423600   |
| N        | -2.76448400 | 0.00974600  | -0.09102900 | H           | 3.79155500  | 2.61287100  | -1.04592000  |
| O        | -3.58998100 | 2.17311500  | 0.11731600  | H           | 3.97449800  | -5.85149400 | -0.24371200  |
| H        | -1.30102700 | -0.77708500 | 0.02442000  | N           | -0.12323000 | -0.35861200 | 0.54208200   |
| H        | 0.35696900  | -3.18640600 | 0.56160000  | C           | -0.78002400 | -1.64335900 | 0.83061600   |
| H        | -0.95685200 | -3.09722100 | -0.62690000 | C           | -0.02402100 | 0.45709500  | 1.76027400   |
| H        | 0.37724500  | 0.40096800  | 1.21875600  | C           | -0.69794600 | 0.36649900  | -0.61226700  |
| H        | 1.20545900  | -1.12986600 | 1.56671000  | H           | -0.84294200 | -2.22585300 | -0.08010600  |
| H        | -7.23398000 | -2.81165200 | 0.20651700  | H           | -1.77663000 | -1.48260600 | 1.22236300   |
| N        | -0.33723300 | -1.24106700 | 0.13658400  | H           | -1.00174100 | 0.61436400  | 2.20423200   |
| C        | 0.38989500  | -0.89569400 | -1.11634000 | H           | 0.43169700  | 1.40789500  | 1.51756200   |
| C        | 1.73081300  | -1.55667900 | -1.32044600 | H           | 0.01081700  | 1.14913900  | -0.86179200  |
| H        | 0.49240900  | 0.18219800  | -1.12545200 | H           | -0.17963200 | -2.17858900 | 1.55818000   |
| H        | -0.26619600 | -1.18330500 | -1.93125300 | H           | 0.60638200  | -0.06845200 | 2.46965300   |
| O        | 2.66571400  | -1.06181100 | -0.40095700 | H           | -0.73223400 | -0.33364300 | -1.44108800  |
| H        | 2.04354200  | -1.32610100 | -2.34098500 | C           | -2.05765000 | 0.99745600  | -0.42282100  |
| H        | 1.65614400  | -2.64238700 | -1.24839600 | O           | -3.04402100 | 0.01012100  | -0.28320700  |
| C        | 3.95561000  | -1.59287100 | -0.59084100 | H           | -2.25626900 | 1.60777500  | -1.30680100  |
| C        | 4.87292700  | -0.94616000 | 0.42813600  | C           | -4.34063600 | 0.54183100  | -0.16075100  |
| H        | 3.94891600  | -2.67508000 | -0.44750700 | C           | -5.30212100 | -0.62216200 | -0.02272900  |
| H        | 4.28352100  | -1.39576500 | -1.61199800 | H           | -4.41058800 | 1.18309900  | 0.72021600   |
| N        | 6.22071900  | -1.48391600 | 0.38445300  | H           | -4.56864600 | 1.15396000  | -1.03435100  |
| H        | 4.86084600  | 0.14178900  | 0.28590900  | N           | -6.66873500 | -0.19346900 | 0.21378500   |
| H        | 4.45985900  | -1.14394100 | 1.41406000  | H           | -5.22220300 | -1.26479300 | -0.90866100  |
| C        | 6.94647100  | -1.16288200 | 1.59629900  | H           | -4.97896400 | -1.21325400 | 0.83052700   |
| C        | 6.95956500  | -1.03106200 | -0.77780900 | C           | -7.47031500 | -1.28200100 | 0.73444700   |
| H        | 6.42153900  | -1.56029600 | 2.46103000  | C           | -7.28744800 | 0.36211200  | -0.97362400  |
| H        | 7.07535300  | -0.08286900 | 1.74275500  | H           | -7.03733400 | -1.65385500 | 1.65936500   |
| H        | 7.08366300  | 0.05927900  | -0.79804500 | H           | -7.55309600 | -2.12347600 | 0.03470800   |
| H        | 6.46081500  | -1.33016000 | -1.69430600 | H           | -8.47515600 | -0.92672600 | 0.94892800   |
| H        | -1.29253500 | -2.83168200 | 1.09195800  | H           | -7.34677800 | -0.36348700 | -1.79509100  |
| H        | -0.43844300 | -0.84107800 | 2.17926800  | H           | -6.73671500 | 1.22764800  | -1.32792600  |
| H        | 7.93453400  | -1.61502600 | 1.56178300  | H           | -8.29768800 | 0.68668800  | -0.73817600  |
| H        | 7.94856300  | -1.48190200 | -0.77720900 | H           | -2.06443100 | 1.66938700  | 0.43665200   |
| C        | 0.30134300  | 3.40780300  | -0.15011700 | C           | 2.26887000  | 3.75258700  | -0.03396400  |
| H        | 0.65303400  | 2.99270600  | -1.09475500 | H           | 1.55557800  | 3.69155700  | -0.85582900  |
| H        | 0.83104400  | 2.88216300  | 0.64448900  | H           | 1.69599700  | 3.68086400  | 0.89054400   |
| C        | 0.63003300  | 4.89433100  | -0.08827800 | C           | 2.99712200  | 5.09010700  | -0.08372400  |
| H        | 0.26564400  | 5.30543900  | 0.85358200  | H           | 3.57857900  | 5.15039600  | -1.00405000  |
| H        | 0.09161700  | 5.41633200  | -0.87974800 | H           | 3.71370100  | 5.14163300  | 0.73636000   |
| C        | 2.11972400  | 5.17338800  | -0.21959800 | C           | 2.04929600  | 6.27734600  | -0.00441400  |
| H        | 2.50683700  | 4.80347200  | -1.16782200 | H           | 2.59269800  | 7.21931800  | -0.04127100  |
| H        | 2.32726900  | 6.24044300  | -0.17085300 | H           | 1.34133700  | 6.27015700  | -0.83173400  |
| H        | 2.68164300  | 4.68954900  | 0.57787000  | H           | 1.47599100  | 6.26116600  | 0.92126300   |
| DMAEE-PC |             |             |             |             |             |             |              |
|          | O           | -1.10737300 | 1.66427800  | 0.04530300  |             |             |              |
|          | C           | -2.43468000 | 1.59303500  | -0.09904400 |             |             |              |
|          | C           | -0.51711200 | 2.95510600  | -0.13686400 |             |             |              |
|          | H           | -0.68907200 | 3.27888300  | -1.15948100 |             |             |              |
|          | C           | -6.73398600 | -1.27233400 | -0.08291900 |             |             |              |
|          | C           | -6.54246500 | 0.08267900  | -0.29844000 |             |             |              |
|          | C           | -5.62947800 | -2.07072200 | 0.17864200  |             |             |              |
|          | C           | -4.36084400 | -1.52218800 | 0.22267300  |             |             |              |

|              |             |             |             |                   |             |             |             |  |
|--------------|-------------|-------------|-------------|-------------------|-------------|-------------|-------------|--|
| C            | -4.16717200 | -0.15668600 | 0.00469800  |                   |             |             |             |  |
| C            | -5.27589200 | 0.64778400  | -0.25820600 |                   |             |             |             |  |
| H            | -5.14565500 | 1.69842600  | -0.42789900 |                   |             |             |             |  |
| H            | -7.38817900 | 0.72020200  | -0.50323800 |                   |             |             |             |  |
| H            | -5.75193100 | -3.12829600 | 0.35089000  |                   |             |             |             |  |
| H            | -3.51018800 | -2.15013700 | 0.42858500  |                   |             |             |             |  |
| N            | -2.85020400 | 0.31457100  | 0.06780700  |                   |             |             |             |  |
| O            | -3.12735300 | 2.55516100  | -0.34208800 |                   |             |             |             |  |
| H            | -2.12339600 | -0.38298900 | 0.23841600  |                   |             |             |             |  |
| H            | -7.72322000 | -1.69889600 | -0.11723500 |                   |             |             |             |  |
| H            | -1.00131800 | 3.66317900  | 0.52797200  |                   |             |             |             |  |
| O            | 2.40178500  | -1.28677700 | -0.39188000 |                   |             |             |             |  |
| N            | 6.02524000  | -1.22139200 | 0.14276400  |                   |             |             |             |  |
| N            | -0.59511300 | -1.70016000 | 0.43731800  |                   |             |             |             |  |
| C            | 6.79538600  | -0.52339300 | 1.15160300  |                   |             |             |             |  |
| C            | 6.63622300  | -1.05348500 | -1.16090200 |                   |             |             |             |  |
| C            | -0.94692600 | -3.08801900 | 0.66795800  |                   |             |             |             |  |
| C            | 0.11386000  | -1.14526400 | 1.57722900  |                   |             |             |             |  |
| C            | 4.63793600  | -0.79474800 | 0.16443100  |                   |             |             |             |  |
| C            | 0.05768800  | -1.48141500 | -0.84849500 |                   |             |             |             |  |
| C            | 3.71658500  | -1.74176000 | -0.57971700 |                   |             |             |             |  |
| C            | 1.44375400  | -2.06600200 | -1.06338600 |                   |             |             |             |  |
| H            | 6.36999200  | -0.70402500 | 2.13531800  |                   |             |             |             |  |
| H            | 6.82707800  | 0.56153900  | 0.98863500  |                   |             |             |             |  |
| H            | 6.63938000  | -0.00699500 | -1.49241700 |                   |             |             |             |  |
| H            | 6.11754000  | -1.64272000 | -1.91040100 |                   |             |             |             |  |
| H            | -1.51077100 | -3.47336900 | -0.17741500 |                   |             |             |             |  |
| H            | -0.07693900 | -3.73374100 | 0.82134800  |                   |             |             |             |  |
| H            | 0.36028500  | -0.10731800 | 1.38449100  |                   |             |             |             |  |
| H            | 1.03659500  | -1.68041200 | 1.80964100  |                   |             |             |             |  |
| H            | 4.51575700  | 0.21862200  | -0.23985800 |                   |             |             |             |  |
| H            | 4.30777200  | -0.76600900 | 1.19981300  |                   |             |             |             |  |
| H            | 0.11526200  | -0.40922500 | -1.01755300 |                   |             |             |             |  |
| H            | -0.59735800 | -1.89493700 | -1.61278900 |                   |             |             |             |  |
| H            | 3.83567200  | -2.75420600 | -0.18685300 |                   |             |             |             |  |
| H            | 3.94593900  | -1.77362400 | -1.64615600 |                   |             |             |             |  |
| H            | 1.65496600  | -2.06581300 | -2.13618100 |                   |             |             |             |  |
| H            | 1.49664100  | -3.10363300 | -0.72707700 |                   |             |             |             |  |
| H            | 7.81850300  | -0.89098900 | 1.15133300  |                   |             |             |             |  |
| H            | 7.66660600  | -1.39764600 | -1.12534300 |                   |             |             |             |  |
| H            | -0.53414400 | -1.18871100 | 2.45020200  |                   |             |             |             |  |
| H            | -1.56964300 | -3.15971800 | 1.55629400  |                   |             |             |             |  |
| C            | 0.95848600  | 2.83880900  | 0.16461200  |                   |             |             |             |  |
| H            | 1.39915600  | 2.07743400  | -0.47797400 |                   |             |             |             |  |
| H            | 1.08589800  | 2.50111300  | 1.19258800  |                   |             |             |             |  |
| C            | 1.68211700  | 4.16494300  | -0.03511700 |                   |             |             |             |  |
| H            | 1.54754500  | 4.49850000  | -1.06415700 |                   |             |             |             |  |
| H            | 1.22455700  | 4.92551400  | 0.59785400  |                   |             |             |             |  |
| C            | 3.16763400  | 4.07065300  | 0.27847200  |                   |             |             |             |  |
| H            | 3.65774100  | 3.33645400  | -0.35919100 |                   |             |             |             |  |
| H            | 3.66420300  | 5.02667300  | 0.12586500  |                   |             |             |             |  |
| H            | 3.33210100  | 3.77247800  | 1.31269600  |                   |             |             |             |  |
| <b>DMIPA</b> |             |             |             | <b>DMIPA -RC1</b> |             |             |             |  |
| N            | -0.66850200 | -0.00002900 | -0.31671700 | O                 | -0.54887100 | 1.26770800  | -1.25207500 |  |
| C            | 0.65599800  | -0.00002800 | 0.31450400  | N                 | 1.58264400  | 0.34853600  | 0.40607700  |  |
| H            | 0.53698300  | -0.00009300 | 1.40795900  | C                 | 2.08030100  | 1.63677400  | 0.85417700  |  |
| C            | -1.44037100 | -1.18237400 | 0.01828100  | H                 | 2.95833900  | 1.56062000  | 1.50179800  |  |
| H            | -2.42594800 | -1.10545800 | -0.43253400 | H                 | 1.30056500  | 2.14834600  | 1.41307600  |  |
| H            | -0.97360800 | -2.07972400 | -0.37180900 | H                 | 2.33994000  | 2.24987300  | -0.00443600 |  |
| H            | -1.57605200 | -1.31058500 | 1.10043200  | C                 | 1.16748400  | -0.45963800 | 1.53956300  |  |
| C            | -1.44032700 | 1.18238600  | 0.01813700  | H                 | 0.37794600  | 0.06071100  | 2.07569700  |  |
| H            | -1.57593800 | 1.31078000  | 1.10027400  | H                 | 1.97862100  | -0.65210800 | 2.24724900  |  |
| H            | -0.97357400 | 2.07966200  | -0.37213600 | H                 | 0.77263300  | -1.41328700 | 1.20594200  |  |
| H            | -2.42593300 | 1.10540900  | -0.43260200 | C                 | 2.50317400  | -0.32383200 | -0.52756400 |  |
| C            | 1.45301900  | -1.24181000 | -0.07180700 | H                 | 2.78699600  | 0.44788000  | -1.24087900 |  |





|           |             |             |             |             |             |             |             |
|-----------|-------------|-------------|-------------|-------------|-------------|-------------|-------------|
| H         | 1.97070200  | 2.81253600  | -1.80023800 | H           | 0.15244600  | 4.98446600  | -0.08702700 |
| H         | 1.01297400  | 1.33543200  | -1.90862100 | H           | 0.79327500  | 4.33197300  | 1.40983400  |
| C         | 0.30682700  | 4.16861400  | -0.04790800 | C           | 0.80574500  | 2.91460300  | -1.75758800 |
| H         | 1.29541200  | 4.62110000  | -0.08809400 | H           | 0.66573200  | 1.91842800  | -2.16786900 |
| H         | -0.31102600 | 4.66299100  | -0.79450500 | H           | 0.04513100  | 3.56557600  | -2.18220800 |
| H         | -0.12424500 | 4.37994700  | 0.92763100  | H           | 1.77310400  | 3.28890800  | -2.08455800 |
| DMIPA -IM |             |             |             | DMIPA -TS2  |             |             |             |
| O         | 1.27060500  | -0.89456400 | -0.01863700 | O           | 1.35140900  | -0.81395100 | -0.01449000 |
| C         | 0.04242000  | -1.49134900 | -0.09589000 | C           | 0.14484500  | -1.42537600 | -0.12562600 |
| N         | -0.16282100 | 2.02084900  | 0.60758700  | N           | -0.34394300 | 1.93404800  | 0.61078900  |
| C         | -1.22906600 | 2.40136000  | 1.55961700  | C           | -1.47133900 | 2.24435500  | 1.50380000  |
| H         | -0.98448600 | 3.34148900  | 2.03709300  | H           | -1.31930400 | 3.19096300  | 2.01197100  |
| H         | -1.30280000 | 1.62258900  | 2.30921900  | H           | -1.54802100 | 1.45568700  | 2.24472200  |
| H         | -2.16847400 | 2.48541200  | 1.02903200  | H           | -2.38926700 | 2.28304600  | 0.93021500  |
| C         | 1.13982900  | 1.97004500  | 1.30453200  | C           | 0.90935000  | 1.95466000  | 1.37923300  |
| H         | 1.06069400  | 1.24554800  | 2.10512200  | H           | 0.84188100  | 1.20004000  | 2.15469700  |
| H         | 1.37060400  | 2.94433100  | 1.71644800  | H           | 1.06022500  | 2.92534000  | 1.84110400  |
| H         | 1.91032900  | 1.65556900  | 0.61797600  | H           | 1.74437400  | 1.71527800  | 0.73784100  |
| C         | -0.17731800 | 2.85585900  | -0.64776900 | C           | -0.33553800 | 2.78822600  | -0.61680600 |
| H         | -1.19950100 | 2.76410400  | -1.00133100 | H           | -1.33089700 | 2.66052500  | -1.03319500 |
| C         | 2.39382400  | -1.75691200 | -0.08108100 | C           | 2.49436600  | -1.65076800 | -0.12543300 |
| H         | 2.35117400  | -2.47796900 | 0.73207100  | H           | 2.46086700  | -2.41772000 | 0.64422900  |
| H         | 2.37649500  | -2.31728900 | -1.01298900 | H           | 2.48657700  | -2.15267100 | -1.08960200 |
| C         | -5.04193700 | -1.41387300 | -0.10351900 | C           | -4.91980700 | -1.56791100 | -0.12610100 |
| C         | -4.14837300 | -2.39930700 | 0.29050000  | C           | -4.00205200 | -2.43309700 | 0.45366100  |
| C         | -4.53582700 | -0.17902700 | -0.48770300 | C           | -4.46057200 | -0.38311100 | -0.68222300 |
| C         | -3.17281800 | 0.05701400  | -0.47672800 | C           | -3.11013500 | -0.07395000 | -0.66130100 |
| C         | -2.25078200 | -0.92687400 | -0.08073500 | C           | -2.17453900 | -0.93410300 | -0.07611100 |
| C         | -2.78083900 | -2.17113900 | 0.30411500  | C           | -2.65141900 | -2.12595500 | 0.48470500  |
| H         | -2.10992200 | -2.95317300 | 0.60484900  | H           | -1.95586500 | -2.80888000 | 0.93680900  |
| H         | -4.51830600 | -3.36679100 | 0.59591900  | H           | -4.34016900 | -3.35850300 | 0.89439200  |
| H         | -5.20607100 | 0.60635800  | -0.80280000 | H           | -5.15377400 | 0.30359100  | -1.14299800 |
| H         | -2.79268800 | 1.01777800  | -0.78721200 | H           | -2.76232500 | 0.84182800  | -1.11220600 |
| N         | -0.91253300 | -0.56561800 | -0.05787900 | N           | -0.84023300 | -0.52542900 | -0.03158500 |
| O         | -0.02510000 | -2.71058800 | -0.20402500 | O           | 0.07623900  | -2.63079800 | -0.30780000 |
| H         | -0.40234200 | 1.02595900  | 0.30164100  | H           | -0.54037800 | 0.78077100  | 0.25708100  |
| H         | -6.10354000 | -1.60264200 | -0.11243700 | H           | -5.96956300 | -1.81320400 | -0.14495500 |
| C         | 3.64498100  | -0.91205000 | 0.01349700  | C           | 3.72562100  | -0.78607500 | 0.02416900  |
| H         | 3.64363200  | -0.18227700 | -0.79627100 | H           | 3.69041200  | -0.27847700 | 0.98790400  |
| H         | 3.62707400  | -0.34989400 | 0.94709800  | H           | 3.71289100  | -0.01239000 | -0.74340600 |
| C         | 4.91366700  | -1.75289700 | -0.05494500 | C           | 5.01130000  | -1.59648700 | -0.08333000 |
| H         | 4.92101500  | -2.32054400 | -0.98584300 | H           | 5.01290000  | -2.37406000 | 0.68096200  |
| H         | 4.90465300  | -2.48647100 | 0.75169500  | H           | 5.03504500  | -2.11060500 | -1.04450700 |
| C         | 6.17970300  | -0.91437000 | 0.03710400  | C           | 6.25909900  | -0.73880000 | 0.06365400  |
| H         | 7.07079100  | -1.53690900 | -0.01263800 | H           | 6.27840400  | -0.23586500 | 1.02930100  |
| H         | 6.23312900  | -0.19339600 | -0.77726500 | H           | 7.16287600  | -1.33960700 | -0.01511100 |
| H         | 6.21545900  | -0.35861000 | 0.97291300  | H           | 6.30197300  | 0.02755900  | -0.70875900 |
| C         | 0.74861600  | 2.25690400  | -1.69253200 | C           | 0.67002000  | 2.26832500  | -1.63226400 |
| H         | 0.54535200  | 2.73476500  | -2.64699500 | H           | 0.50013300  | 2.77077900  | -2.58102600 |
| H         | 1.79502300  | 2.42722300  | -1.45444200 | H           | 1.69437700  | 2.47270200  | -1.33186300 |
| H         | 0.58379500  | 1.18946100  | -1.80243400 | H           | 0.56196900  | 1.19962300  | -1.78801600 |
| C         | 0.12838100  | 4.31875100  | -0.38424500 | C           | -0.11882700 | 4.26551400  | -0.32617100 |
| H         | 1.14575500  | 4.46067600  | -0.02956500 | H           | 0.87223400  | 4.45391400  | 0.07901500  |
| H         | 0.02676700  | 4.86100200  | -1.32048900 | H           | -0.20501300 | 4.82019700  | -1.25714900 |
| H         | -0.55693200 | 4.76548400  | 0.32966800  | H           | -0.85674400 | 4.66513300  | 0.36330500  |
| DMIPA -PC |             |             |             |             |             |             |             |
|           | O           | 1.34172200  | -0.98845700 | 0.02751600  |             |             |             |
|           | C           | 0.17553800  | -1.63704700 | -0.03664700 |             |             |             |
|           | N           | -0.22553300 | 2.15594100  | 0.59484400  |             |             |             |
|           | C           | -1.15825300 | 2.42004300  | 1.67584800  |             |             |             |
|           | H           | -0.98471300 | 3.37988400  | 2.17144400  |             |             |             |
|           | H           | -1.06631800 | 1.63933000  | 2.42750900  |             |             |             |
|           | H           | -2.17692800 | 2.40983200  | 1.29961400  |             |             |             |
|           | C           | 1.13596500  | 2.16301100  | 1.10187400  |             |             |             |

|             |             |             |             |                 |             |             |             |
|-------------|-------------|-------------|-------------|-----------------|-------------|-------------|-------------|
| H           | 1.23773100  | 1.38249400  | 1.85070000  |                 |             |             |             |
| H           | 1.41068100  | 3.11328000  | 1.56894500  |                 |             |             |             |
| H           | 1.84243100  | 1.95234600  | 0.30770800  |                 |             |             |             |
| C           | -0.44918500 | 3.02379600  | -0.57331000 |                 |             |             |             |
| H           | -1.52033600 | 2.96946000  | -0.76024200 |                 |             |             |             |
| C           | 2.51938000  | -1.79476600 | -0.06280900 |                 |             |             |             |
| H           | 2.52449700  | -2.50728900 | 0.75689900  |                 |             |             |             |
| H           | 2.49697200  | -2.35232800 | -0.99422800 |                 |             |             |             |
| C           | -4.96941700 | -1.53228000 | -0.15127600 |                 |             |             |             |
| C           | -4.09478600 | -2.55995400 | 0.16512700  |                 |             |             |             |
| C           | -4.45727400 | -0.26705900 | -0.39967500 |                 |             |             |             |
| C           | -3.09404000 | -0.03694800 | -0.33789500 |                 |             |             |             |
| C           | -2.21377200 | -1.07020700 | -0.01534300 |                 |             |             |             |
| C           | -2.72736600 | -2.34087800 | 0.24033100  |                 |             |             |             |
| H           | -2.06281400 | -3.14570500 | 0.48875200  |                 |             |             |             |
| H           | -4.47540300 | -3.54940800 | 0.36406600  |                 |             |             |             |
| H           | -5.11855300 | 0.54709500  | -0.65041000 |                 |             |             |             |
| H           | -2.70297700 | 0.94552800  | -0.54548200 |                 |             |             |             |
| N           | -0.84967800 | -0.75741100 | 0.06259500  |                 |             |             |             |
| O           | 0.08765600  | -2.83709800 | -0.16812800 |                 |             |             |             |
| H           | -0.60239500 | 0.23195400  | 0.14397500  |                 |             |             |             |
| H           | -6.03064700 | -1.71342400 | -0.20417900 |                 |             |             |             |
| C           | 3.71634800  | -0.87579100 | -0.00134600 |                 |             |             |             |
| H           | 3.65463100  | -0.15603300 | -0.81695900 |                 |             |             |             |
| H           | 3.68498500  | -0.30925600 | 0.92857000  |                 |             |             |             |
| C           | 5.02727000  | -1.64731600 | -0.09171700 |                 |             |             |             |
| H           | 5.07674400  | -2.37176300 | 0.72141100  |                 |             |             |             |
| H           | 5.04522800  | -2.22208200 | -1.01786600 |                 |             |             |             |
| C           | 6.24487200  | -0.73721500 | -0.03544200 |                 |             |             |             |
| H           | 7.16786500  | -1.30969500 | -0.09981500 |                 |             |             |             |
| H           | 6.23924900  | -0.02289100 | -0.85721200 |                 |             |             |             |
| H           | 6.26939700  | -0.17133200 | 0.89450200  |                 |             |             |             |
| C           | 0.25332200  | 2.47230900  | -1.80678300 |                 |             |             |             |
| H           | -0.06201100 | 3.02496800  | -2.68906600 |                 |             |             |             |
| H           | 1.33482400  | 2.56419400  | -1.73599700 |                 |             |             |             |
| H           | 0.00997400  | 1.42349800  | -1.95883000 |                 |             |             |             |
| C           | -0.09093600 | 4.49402900  | -0.35851500 |                 |             |             |             |
| H           | 0.98172900  | 4.63147700  | -0.23940300 |                 |             |             |             |
| H           | -0.40279800 | 5.07800900  | -1.22189500 |                 |             |             |             |
| H           | -0.58558100 | 4.91023000  | 0.51579000  |                 |             |             |             |
| <b>TMPD</b> |             |             |             | <b>TMPD-RC1</b> |             |             |             |
| N           | 3.43307500  | 0.14926000  | 0.39315400  | O               | -3.97617600 | -1.55200100 | -0.48469100 |
| N           | -3.60667500 | 0.16376200  | -0.16451100 | C               | -4.75570300 | -0.59902200 | 0.18975300  |
| C           | 4.31722300  | 1.28488400  | 0.23577200  | H               | -5.79735200 | -0.88018400 | 0.03865200  |
| C           | 4.04365300  | -1.04017300 | -0.16367800 | H               | -3.04403100 | -1.43550100 | -0.21709100 |
| C           | -3.88065800 | 0.21706400  | 1.25078600  | H               | -4.57452000 | -0.63472100 | 1.26834200  |
| C           | -3.23608000 | 1.45283000  | -0.70067500 | N               | 5.58768900  | 0.43897300  | 0.12950400  |
| C           | 2.12829700  | 0.42937100  | -0.18763100 | N               | -1.23574300 | -1.42576000 | 0.24582900  |
| C           | -2.78738300 | -0.96615600 | -0.57238200 | C               | 6.37430200  | 0.92910800  | 1.24181900  |
| C           | 1.05495300  | -0.58370900 | 0.18362900  | C               | 5.96136000  | 1.12794600  | -1.08843400 |
| C           | -1.40907100 | -1.17302800 | 0.06670200  | C               | -0.99413500 | -2.84954200 | 0.35993800  |
| H           | 3.88144900  | 2.16347500  | 0.70499700  | C               | -1.05943600 | -0.74344300 | 1.51327200  |
| H           | 4.51827800  | 1.52745400  | -0.81614100 | C               | 4.16536400  | 0.54965000  | 0.41764500  |
| H           | 4.19580200  | -0.96808800 | -1.24906500 | C               | -0.59417600 | -0.80619700 | -0.91119000 |
| H           | 3.43391600  | -1.91612000 | 0.03296300  | C               | 3.27575900  | -0.20649300 | -0.55860800 |
| H           | -4.21868400 | -0.75634500 | 1.59987400  | C               | 0.91720100  | -0.95638100 | -1.10464400 |
| H           | -3.01815300 | 0.51241300  | 1.85993800  | H               | 6.13305800  | 0.37050100  | 2.14277000  |
| H           | -3.02280300 | 1.36373700  | -1.76293500 | H               | 6.20515800  | 1.99423500  | 1.44832400  |
| H           | -2.36661800 | 1.90995500  | -0.21781800 | H               | 5.73578600  | 2.20224300  | -1.05185100 |
| H           | 2.19498000  | 0.50857200  | -1.28252000 | H               | 5.44685400  | 0.70535200  | -1.94540900 |
| H           | 1.81727700  | 1.40769100  | 0.17487100  | H               | -1.18499500 | -3.33258600 | -0.59508800 |
| H           | -2.67029100 | -0.90857400 | -1.65400100 | H               | 0.02649000  | -3.09179600 | 0.66909700  |
| H           | -3.37213100 | -1.86438600 | -0.37054800 | H               | -1.22520200 | 0.32229800  | 1.38395000  |
| H           | 1.04284800  | -0.69724000 | 1.26811900  | H               | -0.07081500 | -0.88668000 | 1.95440300  |

|          |             |             |             |          |             |             |             |
|----------|-------------|-------------|-------------|----------|-------------|-------------|-------------|
| H        | 1.29407800  | -1.56183900 | -0.23112500 | H        | 3.85391900  | 1.60362500  | 0.45723500  |
| H        | -1.07468200 | -2.16581600 | -0.24027700 | H        | 4.00557500  | 0.14214000  | 1.41445300  |
| H        | -1.50896500 | -1.21610700 | 1.15145200  | H        | -0.84913200 | 0.25198300  | -0.89095000 |
| H        | 5.27004400  | 1.08054100  | 0.71825700  | H        | -1.07944000 | -1.22779000 | -1.79088400 |
| H        | 5.01371600  | -1.20152600 | 0.29982600  | H        | 3.63011800  | -1.23539100 | -0.62835900 |
| H        | -4.67492900 | 0.93674800  | 1.44147400  | H        | 3.35567700  | 0.22083200  | -1.55702800 |
| H        | -4.06984400 | 2.14424200  | -0.58396300 | H        | 1.12768300  | -0.60114400 | -2.11480000 |
| C        | -0.32734400 | -0.16442000 | -0.30598400 | H        | 1.18756200  | -2.01211500 | -1.09992400 |
| H        | -0.56686300 | 0.81329900  | 0.10750200  | H        | 7.43289300  | 0.79452500  | 1.03293400  |
| H        | -0.30477000 | -0.04322600 | -1.39061000 | H        | 7.02968800  | 1.01613000  | -1.25611200 |
|          |             |             |             | H        | -1.67429300 | -3.27200000 | 1.09587300  |
|          |             |             |             | H        | -1.79305200 | -1.11793600 | 2.22433200  |
|          |             |             |             | C        | -4.53609900 | 0.81725600  | -0.31623900 |
|          |             |             |             | H        | -3.48807700 | 1.08705400  | -0.17279700 |
|          |             |             |             | H        | -4.71793400 | 0.83221900  | -1.39146000 |
|          |             |             |             | C        | -5.42524700 | 1.84249700  | 0.37513800  |
|          |             |             |             | H        | -6.47077800 | 1.56672100  | 0.23191600  |
|          |             |             |             | H        | -5.24568300 | 1.81000400  | 1.45050400  |
|          |             |             |             | C        | -5.20294700 | 3.26012000  | -0.13112500 |
|          |             |             |             | H        | -5.40686300 | 3.33224700  | -1.19844200 |
|          |             |             |             | H        | -5.85175500 | 3.96987000  | 0.37858000  |
|          |             |             |             | H        | -4.17371100 | 3.57762100  | 0.02982500  |
|          |             |             |             | C        | 1.81145200  | -0.19370100 | -0.13223900 |
|          |             |             |             | H        | 1.73108500  | -0.61790800 | 0.86662500  |
|          |             |             |             | H        | 1.46570300  | 0.83887700  | -0.05793500 |
| TMPD-RC2 |             |             |             | TMPD-TS1 |             |             |             |
| O        | 2.56487200  | 1.17687000  | -0.65006800 | O        | -2.23041800 | 1.49745400  | 1.10585400  |
| C        | 2.57152200  | -0.41776500 | 2.11209000  | C        | -3.52232100 | 0.40105100  | 0.37497400  |
| C        | 2.97231800  | 2.50779800  | -0.85624200 | C        | -2.30667700 | 2.88773000  | 0.81589100  |
| H        | 4.06092500  | 2.50622800  | -0.84152200 | H        | -3.34766000 | 3.16210700  | 0.94614500  |
| C        | 4.36574600  | -4.06638700 | -1.15496100 | C        | -4.79697900 | -4.27156900 | -0.84470600 |
| C        | 4.13235800  | -2.73223200 | -1.45845100 | C        | -5.52635900 | -3.09191000 | -0.86040800 |
| C        | 4.10208300  | -4.53532000 | 0.12360300  | C        | -3.47743300 | -4.24463400 | -0.41559000 |
| C        | 3.60900700  | -3.67895800 | 1.09439700  | C        | -2.89724500 | -3.05535100 | -0.00870600 |
| C        | 3.37986400  | -2.34451300 | 0.78160400  | C        | -3.62460200 | -1.86556100 | -0.02403100 |
| C        | 3.64045300  | -1.86278300 | -0.49814600 | C        | -4.95223200 | -1.89693900 | -0.45558200 |
| H        | 3.44964100  | -0.82571600 | -0.72512300 | H        | -5.53417500 | -0.99131700 | -0.47454100 |
| H        | 4.33435400  | -2.36152500 | -2.45070800 | H        | -6.55328500 | -3.09668200 | -1.19039900 |
| H        | 4.27948600  | -5.56983100 | 0.36925400  | H        | -2.89560900 | -5.15259300 | -0.39633800 |
| H        | 3.40020600  | -4.03161200 | 2.09065000  | H        | -1.87294400 | -3.03249000 | 0.32616300  |
| N        | 2.88305800  | -1.51672000 | 1.78255000  | N        | -2.95213300 | -0.70880400 | 0.40970500  |
| O        | 2.23459400  | 0.59701500  | 2.58262500  | O        | -4.43334400 | 1.11468800  | 0.14319200  |
| H        | 1.60278900  | 1.10346100  | -0.81639400 | H        | -1.28054800 | 1.15024100  | 1.08862600  |
| H        | 4.74910600  | -4.73466500 | -1.90878700 | H        | -1.72510200 | 3.41655600  | 1.56794500  |
| H        | 2.67020500  | 2.85463400  | -1.84838000 | H        | -5.24978900 | -5.19716600 | -1.16134400 |
| N        | -6.96659200 | -0.81735100 | 0.05626600  | N        | 6.98568600  | -1.14951400 | -0.23549300 |
| N        | -0.16263400 | 0.71611000  | -1.22273000 | N        | 0.31103700  | 0.63574700  | 1.26963600  |
| C        | -8.12347600 | -0.01830600 | -0.28906800 | C        | 8.18906100  | -0.51630600 | 0.26168000  |
| C        | -7.16527200 | -1.45481100 | 1.34145900  | C        | 7.16268300  | -1.54362200 | -1.61787600 |
| C        | 0.01000700  | -0.14122700 | -2.37836100 | C        | 0.20276500  | -0.36160500 | 2.32215700  |
| C        | -0.87328700 | 1.93571300  | -1.55754600 | C        | 1.06565900  | 1.79727200  | 1.71734700  |
| C        | -5.75464600 | -0.01250500 | 0.01621400  | C        | 5.83214700  | -0.28238800 | -0.04730200 |
| C        | -0.62941300 | 0.01264200  | -0.02969800 | C        | 0.71834200  | 0.08286400  | -0.02677500 |
| C        | -4.47020400 | -0.82692900 | 0.07146300  | C        | 4.49595500  | -0.97690200 | -0.26714600 |
| C        | -1.94115100 | -0.77604300 | -0.08392200 | C        | 1.97569600  | -0.78407400 | -0.11043600 |
| H        | -7.99629300 | 0.41221800  | -1.27925200 | H        | 8.07466600  | -0.27525200 | 1.31564400  |
| H        | -8.30147700 | 0.80352000  | 0.41713100  | H        | 8.43659300  | 0.41041900  | -0.27278800 |
| H        | -7.25000600 | -0.73075100 | 2.16299400  | H        | 7.31022900  | -0.68463400 | -2.28624800 |
| H        | -6.34523600 | -2.12787500 | 1.56997400  | H        | 6.30315500  | -2.10257000 | -1.97355100 |
| H        | 0.59092900  | -1.01763900 | -2.10272500 | H        | -0.39543800 | -1.19803900 | 1.97440000  |
| H        | -0.93595000 | -0.47795500 | -2.81118400 | H        | 1.17399200  | -0.73730300 | 2.64920100  |
| H        | -1.02015400 | 2.53356800  | -0.66278900 | H        | 1.15355000  | 2.51272900  | 0.90546300  |
| H        | -1.84765800 | 1.76022600  | -2.01788900 | H        | 2.06586900  | 1.54871200  | 2.07153000  |
| H        | -5.75179900 | 0.73303900  | 0.82462700  | H        | 5.89668700  | 0.60348400  | -0.69576400 |

|         |             |             |             |          |             |             |             |
|---------|-------------|-------------|-------------|----------|-------------|-------------|-------------|
| H       | -5.76783700 | 0.54503700  | -0.91877600 | H        | 5.86559800  | 0.08160500  | 0.97818000  |
| H       | -0.68310500 | 0.74482700  | 0.77419500  | H        | 0.81130000  | 0.92151900  | -0.71364500 |
| H       | 0.16052300  | -0.68845400 | 0.23755200  | H        | -0.11865300 | -0.51883600 | -0.37510000 |
| H       | -4.51178700 | -1.59586600 | -0.70060500 | H        | 4.47183700  | -1.88486300 | 0.33626400  |
| H       | -4.38788200 | -1.34516100 | 1.02565900  | H        | 4.39406500  | -1.28790300 | -1.30573500 |
| H       | -1.95861400 | -1.39217800 | 0.81656400  | H        | 1.96799000  | -1.21751400 | -1.11170300 |
| H       | -1.91869200 | -1.47476100 | -0.91992500 | H        | 1.89159500  | -1.62584300 | 0.57618300  |
| H       | -9.01311200 | -0.64340000 | -0.30323600 | H        | 8.03448600  | -2.18748800 | -1.70323300 |
| H       | -8.07935900 | -2.04285900 | 1.31842900  | H        | 9.03231700  | -1.19510000 | 0.15904300  |
| H       | 0.55483500  | 0.39916700  | -3.14899000 | H        | 0.53153900  | 2.27153000  | 2.53733700  |
| H       | -0.27795800 | 2.51485400  | -2.26046800 | H        | -0.29468800 | 0.08029800  | 3.18171900  |
| C       | 2.44954700  | 3.46156800  | 0.20382400  | C        | -1.83387500 | 3.23099600  | -0.58222700 |
| H       | 1.35822200  | 3.44483800  | 0.19011900  | H        | -0.79963000 | 2.90852700  | -0.70454200 |
| H       | 2.75449900  | 3.09088800  | 1.18192500  | H        | -2.42912500 | 2.67153500  | -1.30336300 |
| C       | 2.93938100  | 4.89052000  | 0.00819000  | C        | -1.94166000 | 4.72322400  | -0.87135700 |
| H       | 4.03005600  | 4.90162100  | 0.01575700  | H        | -2.97585500 | 5.04170600  | -0.73806000 |
| H       | 2.63743400  | 5.24513700  | -0.97811700 | H        | -1.35309600 | 5.27636300  | -0.13886800 |
| C       | 2.41734700  | 5.84689000  | 1.07036300  | C        | -1.47616500 | 5.08538600  | -2.27365500 |
| H       | 2.73142300  | 5.53672900  | 2.06589600  | H        | -2.06862200 | 4.57114800  | -3.02874700 |
| H       | 2.78355300  | 6.85878900  | 0.90780600  | H        | -1.56404900 | 6.15473000  | -2.45468400 |
| H       | 1.32892800  | 5.88357100  | 1.06486000  | H        | -0.43427400 | 4.80774200  | -2.42564800 |
| C       | -3.23042200 | 0.03835100  | -0.12934400 | C        | 3.31478900  | -0.08414800 | 0.09877700  |
| H       | -3.31539900 | 0.56028400  | -1.08018800 | H        | 3.41891200  | 0.22970900  | 1.13553200  |
| H       | -3.19792700 | 0.80803700  | 0.64380900  | H        | 3.34683900  | 0.82471300  | -0.50454800 |
| TMPD-IM |             |             |             | TMPD-TS2 |             |             |             |
| O       | -1.65823200 | 1.73753600  | -0.05733100 | O        | 2.56008600  | 1.38371400  | -0.12609500 |
| C       | -2.92412400 | 1.21683700  | -0.07558500 | C        | 3.22101000  | 0.21178500  | -0.32294900 |
| C       | 0.05429100  | -0.43410900 | 1.61982100  | C        | 3.30555500  | 2.57153900  | -0.35909800 |
| C       | -0.46823300 | -2.57649500 | 0.59163600  | H        | 4.16765600  | 2.59552500  | 0.30263300  |
| C       | -1.56346000 | 3.15288100  | -0.05003400 | C        | 3.66003500  | -4.83472100 | -0.33111600 |
| H       | -2.07711300 | 3.55933100  | -0.91772300 | C        | 4.54451900  | -3.86312100 | 0.11681600  |
| H       | -2.05624700 | 3.54985300  | 0.83457200  | C        | 2.38298800  | -4.45019100 | -0.71258800 |
| C       | -6.24502700 | -2.63340100 | -0.06080900 | C        | 2.00150300  | -3.11978300 | -0.64929500 |
| C       | -6.36238500 | -1.32897700 | 0.39661400  | C        | 2.88063000  | -2.13100700 | -0.19494800 |
| C       | -5.01087500 | -3.05836500 | -0.53476700 | C        | 4.16666200  | -2.53209400 | 0.18890600  |
| C       | -3.92787800 | -2.19771400 | -0.54831800 | H        | 4.86532200  | -1.79333400 | 0.53663400  |
| C       | -4.02544900 | -0.87339000 | -0.08973300 | H        | 5.54169200  | -4.14309800 | 0.42049400  |
| C       | -5.28197300 | -0.45996700 | 0.38662400  | H        | 1.67942100  | -5.18644200 | -1.06939100 |
| H       | -5.40091700 | 0.54689500  | 0.73876300  | H        | 1.01240300  | -2.82844300 | -0.96481700 |
| H       | -7.31141100 | -0.97617600 | 0.77205100  | N        | 2.40528200  | -0.82210500 | -0.09538200 |
| H       | -4.88961000 | -4.06667100 | -0.90068600 | O        | 4.38874000  | 0.21445600  | -0.67898600 |
| H       | -2.97836200 | -2.53800800 | -0.92991300 | H        | 1.15973600  | -0.57460500 | 0.42527500  |
| N       | -2.86619400 | -0.11204900 | -0.10497000 | H        | 3.67572500  | 2.57363500  | -1.38087700 |
| O       | -3.88360300 | 1.97883900  | -0.08181100 | H        | 3.96102100  | -5.86875000 | -0.38321200 |
| H       | -1.34132500 | -0.75757900 | 0.16339900  | N        | 0.08522900  | -0.32710400 | 0.93218500  |
| H       | 0.47860500  | -2.97298800 | 0.93644600  | C        | -0.52600900 | -1.60063800 | 1.33314000  |
| H       | -0.75200200 | -3.05314200 | -0.33812500 | C        | 0.38325500  | 0.49410300  | 2.11304600  |
| H       | 0.17197500  | 0.62037000  | 1.41479700  | C        | -0.66792100 | 0.40329200  | -0.11527500 |
| H       | 0.97599900  | -0.85541900 | 1.99631800  | H        | -0.76560400 | -2.18170000 | 0.45126100  |
| H       | -7.09206800 | -3.30057100 | -0.05033700 | H        | -1.42782800 | -1.42941400 | 1.91235400  |
| N       | -0.35497000 | -1.12063800 | 0.37681600  | H        | -0.51733600 | 0.70556600  | 2.68058100  |
| C       | 0.43662300  | -0.76284900 | -0.83963800 | H        | 0.84635000  | 1.41849700  | 1.79411100  |
| C       | 1.81346000  | -1.38711200 | -1.00365700 | H        | -0.06286100 | 1.27387700  | -0.34001700 |
| H       | 0.49408000  | 0.31905000  | -0.84871100 | H        | 0.18467800  | -2.14949500 | 1.94146500  |
| H       | -0.18961900 | -1.06687900 | -1.67245900 | H        | 1.07748100  | -0.05203400 | 2.74310300  |
| H       | 2.10251800  | -1.14484300 | -2.02621500 | H        | -0.65740700 | -0.23255500 | -0.99698700 |
| H       | 1.74321100  | -2.47255400 | -0.96743800 | C        | -2.09981200 | 0.82441400  | 0.21765700  |
| C       | 4.29487200  | -1.36604300 | -0.52563600 | H        | -2.28654500 | 1.75727800  | -0.31241500 |
| C       | 5.39739600  | -0.89611800 | 0.41221000  | C        | -4.58706300 | 0.35650500  | 0.09365000  |
| H       | 4.31994500  | -2.45487000 | -0.57585400 | C        | -5.66500600 | -0.62569200 | -0.34172500 |
| H       | 4.47102100  | -1.00051600 | -1.53594200 | H        | -4.70380200 | 0.55318500  | 1.15969100  |
| N       | 6.71025600  | -1.43731400 | 0.09512400  | H        | -4.71170300 | 1.31021400  | -0.41698400 |
| H       | 5.41925600  | 0.20315700  | 0.43147900  | N        | -7.01246500 | -0.22966900 | 0.03910200  |
| H       | 5.15008500  | -1.21867900 | 1.42206600  | H        | -5.59564300 | -0.78922100 | -1.42692800 |

|   |             |             |             |   |             |             |             |
|---|-------------|-------------|-------------|---|-------------|-------------|-------------|
| C | 7.63956100  | -1.19405000 | 1.17848100  | H | -5.46509300 | -1.58652700 | 0.12960700  |
| C | 7.24089000  | -0.91255900 | -1.14618500 | C | -7.93966400 | -1.32605200 | -0.14679000 |
| H | 7.26552700  | -1.63996500 | 2.09676500  | C | -7.47024700 | 0.93999700  | -0.68209700 |
| H | 7.80813700  | -0.12523700 | 1.36514300  | H | -7.62505800 | -2.18367500 | 0.44271400  |
| H | 7.35411700  | 0.17972100  | -1.12844600 | H | -8.01882600 | -1.64591200 | -1.19422200 |
| H | 6.59776500  | -1.17051700 | -1.98141600 | H | -8.93153400 | -1.03099000 | 0.18704800  |
| H | -1.23048500 | -2.75314300 | 1.34062800  | H | -7.48769600 | 0.78535200  | -1.76931500 |
| H | -0.73369300 | -0.57451200 | 2.35073100  | H | -6.83540900 | 1.79528000  | -0.47414000 |
| H | 8.60074100  | -1.64753800 | 0.94866700  | H | -8.47882400 | 1.19162300  | -0.36376900 |
| H | 8.21916600  | -1.34721800 | -1.33557100 | H | -2.18699600 | 1.06407700  | 1.27615500  |
| C | -0.09950500 | 3.53277400  | -0.06691100 | C | 2.39864800  | 3.75540100  | -0.11045600 |
| H | 0.37136200  | 3.10021300  | -0.94978200 | H | 1.53338100  | 3.68710400  | -0.76971300 |
| H | 0.39491000  | 3.09811600  | 0.80203000  | H | 2.02398900  | 3.71171700  | 0.91215400  |
| C | 0.10064800  | 5.04334700  | -0.06715800 | C | 3.11443000  | 5.08118900  | -0.33818600 |
| H | -0.38134500 | 5.47160900  | 0.81211100  | H | 3.49561800  | 5.11487100  | -1.35909400 |
| H | -0.40259700 | 5.47378100  | -0.93333000 | H | 3.98424400  | 5.13899200  | 0.31664800  |
| C | 1.56882300  | 5.44146700  | -0.08449700 | C | 2.21463800  | 6.28307700  | -0.09312100 |
| H | 2.07021000  | 5.05416400  | -0.97017300 | H | 2.74788900  | 7.21640500  | -0.26197800 |
| H | 1.68487800  | 6.52339100  | -0.08467100 | H | 1.35167600  | 6.26940300  | -0.75711000 |
| H | 2.09159400  | 5.05216900  | 0.78785400  | H | 1.84367900  | 6.29362800  | 0.93062300  |
| C | 2.91626700  | -0.90260400 | -0.06735400 | C | -3.18451900 | -0.17208700 | -0.18303100 |
| H | 2.74298900  | -1.26391100 | 0.94427600  | H | -3.04878000 | -1.11699300 | 0.33941400  |
| H | 2.89620000  | 0.18682500  | -0.01757600 | H | -3.08373200 | -0.39174300 | -1.24690700 |

TMPD-PC

|   |             |             |             |
|---|-------------|-------------|-------------|
| O | -1.39993700 | 1.73176800  | 0.03249100  |
| C | -2.70929000 | 1.51477400  | -0.12905600 |
| C | -0.97031700 | 3.09215500  | -0.08511800 |
| H | -1.23988400 | 3.46362600  | -1.06910600 |
| C | -6.66777500 | -1.79979900 | -0.27690100 |
| C | -6.62100900 | -0.42606100 | -0.44947100 |
| C | -5.48808900 | -2.48070900 | -0.01193200 |
| C | -4.28814500 | -1.79907500 | 0.07739000  |
| C | -4.24020500 | -0.41453500 | -0.09592300 |
| C | -5.42503000 | 0.27192700  | -0.36244200 |
| H | -5.40753900 | 1.33510300  | -0.49898100 |
| H | -7.52686600 | 0.12189000  | -0.65640800 |
| H | -5.49715300 | -3.55018800 | 0.12671100  |
| H | -3.37870100 | -2.33785700 | 0.28249900  |
| N | -2.98422900 | 0.19593600  | 0.01185600  |
| O | -3.50148800 | 2.39850300  | -0.36650800 |
| H | -2.19280300 | -0.41729900 | 0.21723700  |
| H | -7.60335500 | -2.33035100 | -0.34696500 |
| H | -1.49016600 | 3.69140700  | 0.65625600  |
| N | 6.54538500  | -1.26772500 | 0.01543600  |
| N | -0.57133500 | -1.57836900 | 0.61697200  |
| C | 7.48485900  | -0.46642900 | 0.77162700  |
| C | 7.00807800  | -1.42589800 | -1.34789000 |
| C | -0.85532700 | -2.96740500 | 0.91949600  |
| C | -0.02406000 | -0.89906100 | 1.77585800  |
| C | 5.20838000  | -0.69689800 | 0.08599800  |
| C | 0.18692100  | -1.40268100 | -0.62089000 |
| C | 4.11206000  | -1.62563800 | -0.41597600 |
| C | 1.61379800  | -1.96500700 | -0.70393100 |
| H | 7.16558300  | -0.39804900 | 1.80861600  |
| H | 7.58729900  | 0.55461000  | 0.38083200  |
| H | 7.05017600  | -0.47293300 | -1.89233500 |
| H | 6.36145300  | -2.10014000 | -1.90019300 |
| H | -1.29181500 | -3.45491800 | 0.05176300  |
| H | 0.03178900  | -3.53396300 | 1.21806500  |
| H | 0.20622400  | 0.13077800  | 1.52453000  |
| H | 0.87847400  | -1.37489500 | 2.16884700  |
| H | 5.15995500  | 0.25699500  | -0.45909200 |
| H | 5.01025200  | -0.46621500 | 1.13131000  |
| H | 0.20769400  | -0.33635500 | -0.83742600 |

|                 |             |             |             |                     |             |             |             |
|-----------------|-------------|-------------|-------------|---------------------|-------------|-------------|-------------|
| H               | -0.41003800 | -1.86824400 | -1.40283000 |                     |             |             |             |
| H               | 4.20407400  | -2.58288600 | 0.09800400  |                     |             |             |             |
| H               | 4.23970000  | -1.82712700 | -1.47862000 |                     |             |             |             |
| H               | 1.81558900  | -2.17182100 | -1.75558700 |                     |             |             |             |
| H               | 1.66604900  | -2.92868800 | -0.19796000 |                     |             |             |             |
| H               | 8.46766400  | -0.93116100 | 0.74989900  |                     |             |             |             |
| H               | 8.00737800  | -1.85396200 | -1.34544800 |                     |             |             |             |
| H               | -0.76695100 | -0.89688600 | 2.57118400  |                     |             |             |             |
| H               | -1.56909100 | -3.02102200 | 1.73813700  |                     |             |             |             |
| C               | 0.52428800  | 3.13121900  | 0.12659800  |                     |             |             |             |
| H               | 1.00731900  | 2.49473700  | -0.61396600 |                     |             |             |             |
| H               | 0.75811600  | 2.71773700  | 1.10702900  |                     |             |             |             |
| C               | 1.07174600  | 4.54948600  | 0.02161900  |                     |             |             |             |
| H               | 0.82382200  | 4.96076300  | -0.95703200 |                     |             |             |             |
| H               | 0.57599700  | 5.18343300  | 0.75695100  |                     |             |             |             |
| C               | 2.57712700  | 4.61029100  | 0.23150300  |                     |             |             |             |
| H               | 3.10142400  | 4.00904500  | -0.50959300 |                     |             |             |             |
| H               | 2.94501400  | 5.63105000  | 0.15107800  |                     |             |             |             |
| H               | 2.85166400  | 4.23510000  | 1.21609700  |                     |             |             |             |
| C               | 2.71946600  | -1.04864500 | -0.18656500 |                     |             |             |             |
| H               | 2.58670100  | -0.85101400 | 0.87512500  |                     |             |             |             |
| H               | 2.64273700  | -0.08342000 | -0.69030300 |                     |             |             |             |
| <b>DMAEDMED</b> |             |             |             | <b>DMAEDMED-RC1</b> |             |             |             |
| N               | 3.30129800  | 0.16699400  | 0.37879500  | O                   | -3.87489200 | -1.62431600 | -0.31695700 |
| N               | -3.46543000 | 0.24120500  | -0.19341300 | C                   | -4.64361600 | -0.65448400 | 0.34552600  |
| C               | 4.12380200  | 1.35068900  | 0.23740400  | H                   | -5.68119300 | -0.98195100 | 0.28926700  |
| C               | 3.97471000  | -0.97973500 | -0.19696100 | H                   | -2.93244600 | -1.46082400 | -0.11827900 |
| C               | -3.75011300 | 0.37970000  | 1.21483500  | H                   | -4.38681700 | -0.60762900 | 1.40823100  |
| C               | -2.95211100 | 1.46503600  | -0.76779100 | N                   | 5.41819300  | 0.47033700  | 0.16733300  |
| C               | 1.98201600  | 0.38200700  | -0.19182000 | N                   | -1.10238600 | -1.35911600 | 0.22586800  |
| C               | -2.73824400 | -0.96875000 | -0.53379500 | C                   | 6.14708400  | 0.83121500  | 1.36569300  |
| C               | 0.95106800  | -0.63803900 | 0.26445000  | C                   | 5.82639800  | 1.31432900  | -0.93763700 |
| C               | -1.38896300 | -1.23647200 | 0.13016300  | C                   | -0.79642500 | -2.76135600 | 0.42816600  |
| H               | 3.64663500  | 2.19623300  | 0.72606600  | C                   | -0.85669400 | -0.57513000 | 1.42309600  |
| H               | 4.30499500  | 1.62188000  | -0.81085200 | C                   | 3.98381900  | 0.51325500  | 0.39842500  |
| H               | 4.13630900  | -0.87343100 | -1.27783700 | C                   | -0.54517400 | -0.80740300 | -1.00445500 |
| H               | 3.40435000  | -1.88768700 | -0.02997800 | C                   | 3.18291500  | -0.25135400 | -0.64332000 |
| H               | -4.17946500 | -0.54308100 | 1.59920300  | C                   | 0.95147200  | -0.94880500 | -1.25955300 |
| H               | -2.87117600 | 0.62242200  | 1.82327900  | H                   | 5.88839800  | 0.15546800  | 2.17677000  |
| H               | -2.76240800 | 1.32122000  | -1.82894200 | H                   | 5.94038200  | 1.85671400  | 1.69858100  |
| H               | -2.02700500 | 1.81750500  | -0.30534100 | H                   | 5.59663000  | 2.37391000  | -0.76408400 |
| H               | 2.02177200  | 0.39683600  | -1.29077700 | H                   | 5.33723300  | 1.01089100  | -1.85750100 |
| H               | 1.63491000  | 1.36326400  | 0.12204400  | H                   | -1.02369400 | -3.32143100 | -0.47547700 |
| H               | -2.60498400 | -0.98027500 | -1.61550500 | H                   | 0.24958100  | -2.94098700 | 0.69064800  |
| H               | -3.38189500 | -1.81422600 | -0.28973500 | H                   | -1.12315000 | 0.46264200  | 1.24092200  |
| H               | 0.89434500  | -0.61550500 | 1.35161500  | H                   | 0.18252900  | -0.60857100 | 1.75055300  |
| H               | 1.25424200  | -1.65233200 | -0.01500200 | H                   | 3.62052800  | 1.54964900  | 0.45356400  |
| H               | -1.11378300 | -2.27384300 | -0.10270200 | H                   | 3.78386500  | 0.05971400  | 1.36590400  |
| H               | -1.49058500 | -1.18647400 | 1.21321300  | H                   | -0.81524700 | 0.24694100  | -1.03965900 |
| H               | 5.08889200  | 1.18594100  | 0.71029600  | H                   | -1.05778400 | -1.29110900 | -1.83511900 |
| H               | 4.94522600  | -1.10653400 | 0.27609500  | H                   | 3.51230100  | -1.28907500 | -0.64471500 |
| H               | -4.47772400 | 1.17579100  | 1.36199200  | H                   | 3.37210100  | 0.14113600  | -1.64765600 |
| H               | -3.70020900 | 2.25014300  | -0.66526500 | H                   | 1.13058000  | -0.62332600 | -2.29260800 |
| N               | -0.35538200 | -0.29991100 | -0.27240700 | H                   | 1.23837100  | -1.99811000 | -1.21907000 |
| H               | -0.29884600 | -0.30247600 | -1.28161300 | H                   | 7.21593700  | 0.74949800  | 1.18376500  |
|                 |             |             |             | H                   | 6.89939100  | 1.22417000  | -1.08742600 |
|                 |             |             |             | H                   | -1.41474100 | -3.15086500 | 1.23331200  |
|                 |             |             |             | H                   | -1.48487300 | -0.95030500 | 2.22824000  |
|                 |             |             |             | C                   | -4.51666100 | 0.72941900  | -0.26999300 |
|                 |             |             |             | H                   | -3.47284100 | 1.04537700  | -0.22120000 |
|                 |             |             |             | H                   | -4.77315600 | 0.66200000  | -1.32785800 |
|                 |             |             |             | C                   | -5.39617000 | 1.76892800  | 0.41234400  |
|                 |             |             |             | H                   | -6.43703000 | 1.44635300  | 0.36484100  |
|                 |             |             |             | H                   | -5.14060000 | 1.81947800  | 1.47151000  |

|                     |             |             |             |                     |             |             |             |
|---------------------|-------------|-------------|-------------|---------------------|-------------|-------------|-------------|
|                     |             |             |             | C                   | -5.26798800 | 3.15395800  | -0.20457800 |
|                     |             |             |             | H                   | -5.54968200 | 3.14274300  | -1.25647000 |
|                     |             |             |             | H                   | -5.90740800 | 3.87463400  | 0.30164700  |
|                     |             |             |             | H                   | -4.24369700 | 3.51855200  | -0.14171100 |
|                     |             |             |             | N                   | 1.76957500  | -0.21733600 | -0.30968700 |
|                     |             |             |             | H                   | 1.46423600  | 0.74620300  | -0.30014000 |
| <b>DMAEDMED-RC2</b> |             |             |             | <b>DMAEDMED-TS1</b> |             |             |             |
| O                   | 2.44033100  | 1.19818200  | -0.68728900 | O                   | -2.07091800 | 1.49475700  | 1.15517000  |
| C                   | 2.52603500  | -0.40317900 | 2.07294700  | C                   | -3.45731300 | 0.49118700  | 0.45860900  |
| C                   | 2.81928100  | 2.52924000  | -0.94124800 | C                   | -2.08543200 | 2.89521700  | 0.90900600  |
| H                   | 3.90397700  | 2.53253500  | -1.03484500 | H                   | -3.10040000 | 3.22191900  | 1.10672300  |
| C                   | 4.48197300  | -3.95999400 | -1.20198000 | C                   | -5.02866800 | -4.06856600 | -0.84237800 |
| C                   | 4.14447900  | -2.65027000 | -1.51384400 | C                   | -5.68741400 | -2.84822200 | -0.81611900 |
| C                   | 4.29796500  | -4.42647400 | 0.09137000  | C                   | -3.69898900 | -4.12749300 | -0.44922000 |
| C                   | 3.78030400  | -3.59196000 | 1.06833800  | C                   | -3.03922300 | -2.98261600 | -0.03630300 |
| C                   | 3.44575400  | -2.28212400 | 0.74660200  | C                   | -3.69579500 | -1.75258700 | -0.00809800 |
| C                   | 3.62647300  | -1.80283900 | -0.54769900 | C                   | -5.03362600 | -1.69738300 | -0.40426100 |
| H                   | 3.35807100  | -0.78424900 | -0.78029500 | H                   | -5.56165200 | -0.75919100 | -0.39011200 |
| H                   | 4.28479200  | -2.28159200 | -2.51743500 | H                   | -6.72102600 | -2.78622000 | -1.11832500 |
| H                   | 4.55693800  | -5.44198900 | 0.34376800  | H                   | -3.17126200 | -5.06801000 | -0.46308000 |
| H                   | 3.63253000  | -3.94293000 | 2.07605300  | H                   | -2.00680100 | -3.02609900 | 0.27050200  |
| N                   | 2.92630200  | -1.47618400 | 1.75401800  | N                   | -2.94474400 | -0.64629400 | 0.42820500  |
| O                   | 2.11262400  | 0.58721400  | 2.53458900  | O                   | -4.33949100 | 1.25870100  | 0.29952900  |
| H                   | 1.46848400  | 1.11660300  | -0.77450800 | H                   | -1.14396200 | 1.09758100  | 1.07443500  |
| H                   | 4.88459000  | -4.61127300 | -1.96063700 | H                   | -1.43371300 | 3.36839100  | 1.64043200  |
| H                   | 2.41829900  | 2.86808300  | -1.90049400 | H                   | -5.54343200 | -4.95952300 | -1.16370500 |
| N                   | -6.83679000 | -0.81886800 | 0.01121100  | N                   | 6.84216100  | -1.17611500 | -0.18361000 |
| N                   | -0.31353100 | 0.71276100  | -1.07254600 | N                   | 0.42203600  | 0.49185200  | 1.14635000  |
| C                   | -7.93164400 | 0.01894400  | -0.43251500 | C                   | 7.96821600  | -0.58619200 | 0.51044200  |
| C                   | -7.14171100 | -1.39439300 | 1.30571600  | C                   | 7.17062800  | -1.38498600 | -1.57953700 |
| C                   | -0.21530200 | 0.00779200  | -2.33565200 | C                   | 0.32408800  | -0.54221200 | 2.16468800  |
| C                   | -1.10353700 | 1.92570200  | -1.19203500 | C                   | 1.27268000  | 1.58898500  | 1.59006400  |
| C                   | -5.58449500 | -0.08099500 | 0.01306700  | C                   | 5.64516300  | -0.37064700 | -0.00865100 |
| C                   | -0.66291000 | -0.14826300 | 0.05304200  | C                   | 0.73887400  | -0.02774400 | -0.18606500 |
| C                   | -4.35765900 | -0.97853800 | 0.03642000  | C                   | 4.36232300  | -1.11673100 | -0.33876300 |
| C                   | -1.94084800 | -0.97697500 | -0.02421900 | C                   | 1.95154900  | -0.93608100 | -0.34480700 |
| H                   | -7.73019800 | 0.39684800  | -1.43151000 | H                   | 7.74398300  | -0.48989700 | 1.56963100  |
| H                   | -8.10619400 | 0.87865100  | 0.22748800  | H                   | 8.23276000  | 0.40795400  | 0.12725000  |
| H                   | -7.26315700 | -0.63174800 | 2.08624100  | H                   | 7.37451000  | -0.44464300 | -2.10850500 |
| H                   | -6.35750500 | -2.07516900 | 1.62064800  | H                   | 6.36210700  | -1.89244000 | -2.09562700 |
| H                   | 0.41329700  | -0.87119400 | -2.21771800 | H                   | -0.32949700 | -1.33699400 | 1.81873100  |
| H                   | -1.18452000 | -0.31152000 | -2.72764100 | H                   | 1.29353800  | -0.97161100 | 2.42285500  |
| H                   | -1.14229100 | 2.43167600  | -0.23116300 | H                   | 1.31334200  | 2.35245100  | 0.81848700  |
| H                   | -2.12578300 | 1.73950600  | -1.52096800 | H                   | 2.28815200  | 1.26671900  | 1.81161200  |
| H                   | -5.53992300 | 0.62480800  | 0.85499200  | H                   | 5.69628600  | 0.55286100  | -0.60349400 |
| H                   | -5.54101400 | 0.51339900  | -0.89600900 | H                   | 5.59121200  | -0.06855100 | 1.03420700  |
| H                   | -0.69453000 | 0.47722600  | 0.94371800  | H                   | 0.84136400  | 0.82892000  | -0.84943800 |
| H                   | 0.16131900  | -0.84740300 | 0.18911100  | H                   | -0.13039700 | -0.58801700 | -0.52393700 |
| H                   | -4.38318300 | -1.62808500 | -0.83700600 | H                   | 4.29968600  | -2.00122400 | 0.29296800  |
| H                   | -4.36765600 | -1.63130300 | 0.91530300  | H                   | 4.37009700  | -1.46837800 | -1.37535400 |
| H                   | -1.91523800 | -1.68023300 | 0.81839600  | H                   | 1.91386900  | -1.33467400 | -1.36672100 |
| H                   | -1.93631500 | -1.58606000 | -0.92646000 | H                   | 1.86396400  | -1.79509800 | 0.31762000  |
| H                   | -8.84874700 | -0.56398600 | -0.46898700 | H                   | 8.05631900  | -2.01083400 | -1.65479100 |
| H                   | -8.06743700 | -1.96099600 | 1.24364700  | H                   | 8.84057100  | -1.22658100 | 0.40520700  |
| H                   | 0.24528700  | 0.65840400  | -3.07515900 | H                   | 0.84195900  | 2.02925400  | 2.48618300  |
| H                   | -0.62631100 | 2.59163200  | -1.90787400 | H                   | -0.10665500 | -0.11378800 | 3.06589800  |
| C                   | 2.39984500  | 3.48808900  | 0.15942000  | C                   | -1.67394200 | 3.25577300  | -0.50415300 |
| H                   | 1.31277700  | 3.46636200  | 0.25470100  | H                   | -0.66694200 | 2.88394100  | -0.69469600 |
| H                   | 2.80253200  | 3.12604200  | 1.10502200  | H                   | -2.33790100 | 2.75018400  | -1.20478200 |
| C                   | 2.86079300  | 4.91772700  | -0.09297700 | C                   | -1.71763000 | 4.75961500  | -0.74602800 |
| H                   | 3.94688300  | 4.93387200  | -0.19223800 | H                   | -2.72446900 | 5.12699300  | -0.54591500 |
| H                   | 2.46195100  | 5.26366100  | -1.04742000 | H                   | -1.06099800 | 5.25921200  | -0.03319200 |
| C                   | 2.44005600  | 5.87949400  | 1.00853800  | C                   | -1.31128700 | 5.13924700  | -2.16202500 |
| H                   | 2.85173200  | 5.57831600  | 1.97069300  | H                   | -1.97141800 | 4.67994100  | -2.89610700 |



|             |             |             |             |              |             |             |             |
|-------------|-------------|-------------|-------------|--------------|-------------|-------------|-------------|
| H           | 2.78299500  | 6.89188300  | 0.80379100  | H            | -1.35102900 | 6.21671800  | -2.30853800 |
| H           | 1.35614900  | 5.91090800  | 1.10935500  | H            | -0.29588100 | 4.81208300  | -2.38031100 |
| N           | -3.14984500 | -0.17410400 | -0.02348400 | N            | 3.21169300  | -0.27318800 | -0.06510000 |
| H           | -3.12830400 | 0.43502600  | 0.78289200  | H            | 3.27373500  | 0.55381900  | -0.64301500 |
| DMAEDMED-IM |             |             |             | DMAEDMED-TS2 |             |             |             |
| O           | -1.75625400 | 1.76010300  | -0.03825600 | O            | 2.28798000  | 1.55376700  | -0.05143700 |
| C           | -2.95869700 | 1.10928600  | 0.03567500  | C            | 3.15732800  | 0.51134100  | -0.13432100 |
| C           | 0.25273500  | -0.46910700 | 1.37175900  | C            | 2.85978700  | 2.85452000  | -0.09993100 |
| C           | -0.09708300 | -2.45932300 | 0.01092600  | H            | 3.56866100  | 2.97045200  | 0.71579000  |
| C           | -1.79879100 | 3.17226900  | 0.08714500  | C            | 4.41009700  | -4.39678400 | -0.15371500 |
| H           | -2.45394300 | 3.58841800  | -0.67411700 | C            | 5.01574300  | -3.32414000 | 0.48625300  |
| H           | -2.21238400 | 3.44366100  | 1.05576600  | C            | 3.19016500  | -4.19672300 | -0.78293700 |
| C           | -5.84180600 | -3.07763100 | 0.13132900  | C            | 2.59123500  | -2.94743400 | -0.77317900 |
| C           | -6.01318900 | -1.84212400 | 0.73898600  | C            | 3.18706400  | -1.85939500 | -0.12683100 |
| C           | -4.66403000 | -3.31385400 | -0.56523000 | C            | 4.41810700  | -2.07429700 | 0.50590800  |
| C           | -3.68797500 | -2.33683300 | -0.64859000 | H            | 4.90234600  | -1.25511300 | 1.00516000  |
| C           | -3.84067500 | -1.08099100 | -0.03812400 | H            | 5.96391500  | -3.46070900 | 0.98349800  |
| C           | -5.04010900 | -0.85765800 | 0.66003800  | H            | 2.70259200  | -5.01383800 | -1.29180800 |
| H           | -5.19950600 | 0.09297500  | 1.13260400  | H            | 1.65205400  | -2.79747500 | -1.28108000 |
| H           | -6.92004500 | -1.63612300 | 1.28783900  | N            | 2.49306700  | -0.64797400 | -0.10035100 |
| H           | -4.50417500 | -4.26410600 | -1.05178900 | O            | 4.35578500  | 0.71520200  | -0.24470500 |
| H           | -2.78211100 | -2.52972200 | -1.20129400 | H            | 1.14782600  | -0.62969300 | 0.15357300  |
| N           | -2.77572000 | -0.19750100 | -0.13279600 | H            | 3.40715200  | 2.97625400  | -1.03097100 |
| O           | -3.98145900 | 1.76004100  | 0.21401700  | H            | 4.88053100  | -5.36690300 | -0.16317000 |
| H           | -1.17739000 | -0.70335400 | -0.06913100 | N            | -0.03546400 | -0.57204000 | 0.43133000  |
| H           | 0.90378000  | -2.79505800 | 0.25092100  | C            | -0.50791200 | -1.94641600 | 0.66026200  |
| H           | -0.37847800 | -2.80351100 | -0.97655900 | C            | -0.11087500 | 0.21438100  | 1.66905600  |
| H           | 0.12265700  | 0.60468400  | 1.37443800  | C            | -0.65965200 | 0.09666000  | -0.73387300 |
| H           | 1.28365400  | -0.72970200 | 1.56333200  | H            | -0.43653400 | -2.50774100 | -0.26364500 |
| H           | -6.60561000 | -3.83587500 | 0.19752600  | H            | -1.53593500 | -1.94285000 | 1.00043400  |
| N           | -0.14978700 | -0.98456900 | 0.04517700  | H            | -1.12421500 | 0.23014400  | 2.05698000  |
| C           | 0.55747700  | -0.34228000 | -1.10184200 | H            | 0.22801100  | 1.22328500  | 1.47311000  |
| C           | 1.94213800  | -0.86785400 | -1.42167100 | H            | 0.00163700  | 0.91516800  | -0.99857600 |
| H           | 0.58080500  | 0.71978000  | -0.88960100 | H            | 0.12804200  | -2.40904800 | 1.40750800  |
| H           | -0.08120500 | -0.49421900 | -1.96600300 | H            | 0.54408600  | -0.24282700 | 2.40323700  |
| H           | 2.25139200  | -0.35664400 | -2.34032200 | H            | -0.64081900 | -0.61932000 | -1.55085700 |
| H           | 1.89564900  | -1.92611000 | -1.66504800 | C            | -2.06022700 | 0.65337400  | -0.55532100 |
| C           | 4.22242400  | -1.15941900 | -0.68124700 | H            | -2.28230500 | 1.21813400  | -1.46860000 |
| C           | 5.15823900  | -0.97433400 | 0.50235900  | C            | -4.40352100 | 0.18136200  | -0.21006000 |
| H           | 4.16230200  | -2.22005000 | -0.91783100 | C            | -5.39790700 | -0.92858800 | 0.09005100  |
| H           | 4.61240700  | -0.65661000 | -1.57107000 | H            | -4.43778600 | 0.91063300  | 0.59737300  |
| N           | 6.49863900  | -1.47844500 | 0.25513800  | H            | -4.67392700 | 0.71153700  | -1.12833200 |
| H           | 5.17831400  | 0.08559900  | 0.79372900  | N            | -6.76180500 | -0.45161000 | 0.24584400  |
| H           | 4.73975300  | -1.52247700 | 1.34259600  | H            | -5.33277000 | -1.70083400 | -0.68995000 |
| C           | 7.21530900  | -1.67849000 | 1.49778200  | H            | -5.09573600 | -1.39880200 | 1.02244300  |
| C           | 7.25989400  | -0.61593300 | -0.62628300 | C            | -7.58032500 | -1.43700900 | 0.92179100  |
| H           | 6.67562800  | -2.37795000 | 2.13091500  | C            | -7.36747900 | -0.08249100 | -1.01794600 |
| H           | 7.35797300  | -0.74827100 | 2.06286400  | H            | -7.16003200 | -1.66384700 | 1.89815900  |
| H           | 7.40784800  | 0.38772000  | -0.20650900 | H            | -7.66624200 | -2.37723500 | 0.36175200  |
| H           | 6.76434800  | -0.50895300 | -1.58577200 | H            | -8.58327600 | -1.04331300 | 1.06732300  |
| H           | -0.79645200 | -2.84184000 | 0.74380800  | H            | -7.43416400 | -0.92843300 | -1.71467000 |
| H           | -0.39820200 | -0.91393400 | 2.11552700  | H            | -6.80272600 | 0.70774300  | -1.50185800 |
| H           | 8.19753800  | -2.09644500 | 1.29129600  | H            | -8.37423600 | 0.28884300  | -0.84394100 |
| H           | 8.23929100  | -1.05227900 | -0.80555400 | H            | -2.07495000 | 1.37543200  | 0.25781800  |
| C           | -0.39196300 | 3.70609200  | -0.06635000 | C            | 1.74152800  | 3.86646500  | 0.00597500  |
| H           | 0.00271200  | 3.39705900  | -1.03432000 | H            | 1.03434100  | 3.70439600  | -0.80737600 |
| H           | 0.24728600  | 3.25865600  | 0.69499500  | H            | 1.19843100  | 3.70417200  | 0.93696100  |
| C           | -0.33879200 | 5.22454600  | 0.04854200  | C            | 2.26053100  | 5.29830100  | -0.04217300 |
| H           | -0.74277600 | 5.52786600  | 1.01476600  | H            | 2.80977700  | 5.45203300  | -0.97135600 |
| H           | -0.98778700 | 5.66651800  | -0.70790900 | H            | 2.97588600  | 5.45048600  | 0.76641300  |
| C           | 1.07019700  | 5.77652800  | -0.10753800 | C            | 1.14721300  | 6.32943400  | 0.06514700  |
| H           | 1.48810800  | 5.51692400  | -1.07902500 | H            | 1.54241600  | 7.34251900  | 0.02723300  |
| H           | 1.08145000  | 6.86116500  | -0.02123600 | H            | 0.43235500  | 6.22166600  | -0.74918000 |
| H           | 1.73568900  | 5.37633200  | 0.65589900  | H            | 0.60085100  | 6.22139100  | 1.00087300  |
| N           | 2.88965100  | -0.68918700 | -0.33928700 | N            | -3.05772700 | -0.36314500 | -0.28158800 |

|             |             |             |             |   |             |             |             |
|-------------|-------------|-------------|-------------|---|-------------|-------------|-------------|
| H           | 2.94188500  | 0.29530000  | -0.11544900 | H | -3.02727600 | -1.05006100 | -1.02270400 |
| DMAEDMED-PC |             |             |             |   |             |             |             |
| O           | -1.51595000 | 1.78934000  | 0.00209000  |   |             |             |             |
| C           | -2.80682200 | 1.44424000  | 0.05758600  |   |             |             |             |
| C           | -1.23786500 | 3.19283500  | 0.01201100  |   |             |             |             |
| H           | -1.74221300 | 3.65904900  | -0.82886800 |   |             |             |             |
| C           | -6.43145100 | -2.21660900 | 0.06104100  |   |             |             |             |
| C           | -6.48454700 | -0.89111100 | 0.46239600  |   |             |             |             |
| C           | -5.21593800 | -2.74562300 | -0.34842600 |   |             |             |             |
| C           | -4.07678700 | -1.96030000 | -0.35986100 |   |             |             |             |
| C           | -4.12934100 | -0.62674800 | 0.04704600  |   |             |             |             |
| C           | -5.34891300 | -0.09478300 | 0.46391900  |   |             |             |             |
| H           | -5.40562000 | 0.92889300  | 0.77949600  |   |             |             |             |
| H           | -7.42023100 | -0.46353300 | 0.78665800  |   |             |             |             |
| H           | -5.15064700 | -3.77375500 | -0.66732200 |   |             |             |             |
| H           | -3.13934400 | -2.37514400 | -0.69135100 |   |             |             |             |
| N           | -2.92883900 | 0.09594800  | 0.03736900  |   |             |             |             |
| O           | -3.70727000 | 2.25103500  | 0.11359700  |   |             |             |             |
| H           | -2.06410900 | -0.44586600 | -0.03309700 |   |             |             |             |
| H           | -7.32018000 | -2.82647000 | 0.06610500  |   |             |             |             |
| H           | -1.63454600 | 3.62547300  | 0.92562200  |   |             |             |             |
| N           | 6.46044600  | -1.39390400 | 0.25554500  |   |             |             |             |
| N           | -0.34575200 | -1.46352900 | 0.07782900  |   |             |             |             |
| C           | 7.22456100  | -1.34569400 | 1.48496800  |   |             |             |             |
| C           | 7.09639000  | -0.57751900 | -0.75888900 |   |             |             |             |
| C           | -0.49892100 | -2.90443500 | 0.07276300  |   |             |             |             |
| C           | 0.09833600  | -0.98436700 | 1.37498500  |   |             |             |             |
| C           | 5.07697600  | -1.01316500 | 0.48737100  |   |             |             |             |
| C           | 4.08306600  | -0.95666200 | -1.06372900 |   |             |             |             |
| C           | 4.13676000  | -1.45099500 | -0.62435700 |   |             |             |             |
| C           | 1.81826300  | -1.48404200 | -1.31343100 |   |             |             |             |
| H           | 6.78347100  | -2.00955000 | 2.22394600  |   |             |             |             |
| H           | 7.27272400  | -0.33828900 | 1.91852900  |   |             |             |             |
| H           | 7.13463200  | 0.48394900  | -0.48062800 |   |             |             |             |
| H           | 6.57154000  | -0.65791600 | -1.70524600 |   |             |             |             |
| H           | -0.85312800 | -3.23660600 | -0.89989600 |   |             |             |             |
| H           | 0.43042000  | -3.43626600 | 0.29697300  |   |             |             |             |
| H           | 0.19532000  | 0.09663900  | 1.34959200  |   |             |             |             |
| H           | 1.05228600  | -1.41004400 | 1.68686900  |   |             |             |             |
| H           | 4.98348100  | 0.07163000  | 0.64126500  |   |             |             |             |
| H           | 4.74451500  | -1.48907700 | 1.40643200  |   |             |             |             |
| H           | 0.44303400  | 0.12699700  | -0.97367400 |   |             |             |             |
| H           | -0.17684600 | -1.17875200 | -1.95539200 |   |             |             |             |
| H           | 4.18942900  | -2.53425800 | -0.72074900 |   |             |             |             |
| H           | 4.44851700  | -1.03329500 | -1.58728000 |   |             |             |             |
| H           | 2.11573100  | -1.13408400 | -2.31075900 |   |             |             |             |
| H           | 1.80967500  | -2.57146200 | -1.36505600 |   |             |             |             |
| H           | 8.24326200  | -1.67614700 | 1.29721600  |   |             |             |             |
| H           | 8.11621500  | -0.92012500 | -0.91517200 |   |             |             |             |
| H           | -0.65264800 | -1.23812200 | 2.12092100  |   |             |             |             |
| H           | -1.23345800 | -3.19339900 | 0.82035800  |   |             |             |             |
| C           | 0.25900400  | 3.37259000  | -0.07739300 |   |             |             |             |
| H           | 0.62197500  | 2.89609600  | -0.98749300 |   |             |             |             |
| H           | 0.73184800  | 2.86366400  | 0.76198400  |   |             |             |             |
| C           | 0.65234500  | 4.84485300  | -0.07474400 |   |             |             |             |
| H           | 0.16602500  | 5.35018500  | -0.90931100 |   |             |             |             |
| H           | 0.27660600  | 5.31744400  | 0.83289500  |   |             |             |             |
| C           | 2.15725100  | 5.04679100  | -0.16660200 |   |             |             |             |
| H           | 2.55654000  | 4.61218100  | -1.08164100 |   |             |             |             |
| H           | 2.41345800  | 6.10418100  | -0.16236500 |   |             |             |             |
| H           | 2.66831300  | 4.57802200  | 0.67285100  |   |             |             |             |
| N           | 2.77121800  | -1.08310500 | -0.29444300 |   |             |             |             |
| H           | 2.72456100  | -0.07864000 | -0.19194000 |   |             |             |             |
